1  
2  
3  
4  
5  
6  
7  
8  
9  
10  
11  
12  
13  
14  
15  
16  
17  
18  
19  
20  
21  
22  
23  
24  
25  
26  
27  
28  
29  
30  
31  
32  
33  
34  
35  
36  
37  
38  
39  
40  
41  
42  
43

## **Coordinated electrical activity in the olfactory bulb gates the oscillatory entrainment of entorhinal networks in neonatal mice**

**Sabine Gretenkord<sup>1\*</sup>, Johanna K. Kostka<sup>1</sup>, Henrike Hartung<sup>1</sup>, Katja Watznauer<sup>2</sup>, David Fleck<sup>2</sup>, Angélica Minier-Toribio<sup>1</sup>, Marc Spehr<sup>2</sup> & Ileana L. Hanganu-Opatz<sup>1\*</sup>**

<sup>1</sup>*Developmental Neurophysiology, Institute of Neuroanatomy, University Medical Center Hamburg-Eppendorf, 20251 Hamburg, Germany*

<sup>2</sup>*Department of Chemosensation, Institute of Biology II, RWTH Aachen University, 52074 Aachen, Germany*

\*Corresponding authors: Ileana L. Hanganu-Opatz  
Dev. Neurophysiology  
Institute of Neuroanatomy  
University Medical Center Hamburg-Eppendorf  
Falkrenried 94  
20251 Hamburg  
Germany  
Email: hangop@zmnh.uni-hamburg.de

Sabine Gretenkord  
Dev. Neurophysiology  
Institute of Neuroanatomy  
University Medical Center Hamburg-Eppendorf  
Falkrenried 94  
20251 Hamburg  
Germany  
Email: sabine.gretenkord@zmnh.uni-hamburg.de

Figures: 8

Tables: 1

Number of pages: 38

Supplemental Material: 18 pages (4 figures, 1 table, Supplemental Methods)

Number of words in Abstract: 140

Number of words in Introduction: 555

Number of words in Discussion: 1734

44 **ABSTRACT**

45 While the developmental principles of sensory and cognitive processing have been  
46 extensively investigated, their synergy has been largely neglected. During early life, most  
47 sensory systems are still largely immature. As a notable exception, the olfactory system  
48 reaches full maturity during intrauterine life, controlling mother-offspring interactions and  
49 neonatal survival. Here, we elucidate the structural and functional principles underlying the  
50 communication between olfactory bulb (OB) and lateral entorhinal cortex (LEC) – the  
51 gatekeeper of limbic circuitry – during neonatal mouse development. Combining  
52 optogenetics, pharmacology, and electrophysiology *in vivo* with axonal tracing, we show that  
53 mitral cell-dependent discontinuous theta bursts in OB drive network oscillations and time the  
54 firing in LEC via axonal projections confined to upper cortical layers. Pharmacological  
55 silencing of OB activity diminishes entorhinal oscillations. Moreover, odor exposure boosts  
56 OB-entorhinal coupling at fast frequencies. Thus, early OB activity shapes the maturation of  
57 entorhinal circuits.

58 **Running title:**

59 Olfactory control of entorhinal development

60 **Keywords:**

61 Development, olfactory, entorhinal, oscillations, optogenetics, mitral cells, connectivity

62

63

64 **INTRODUCTION**

65 Coordinated patterns of electrical activity periodically entrain developing neuronal networks  
66 in rhythms with a broad frequency spectrum. These patterns have been proposed to critically  
67 shape brain maturation (1-3). Experimental evidence supporting this hypothesis has been  
68 mainly provided for sensory systems. For example, in the visual and auditory systems,  
69 spontaneous activity from sensory periphery (i.e., retina or cochlea) controls the formation of  
70 cortical representations underlying stimulus perception (4, 5). Theta band spindle bursts and  
71 gamma oscillations in the developing somatosensory system promote thalamo-cortical  
72 connectivity and maturation of coupling with the motor system (6, 7). Overall, the  
73 discontinuous oscillatory activity in sensory cortices during development has multifold origin,  
74 including stimulus-independent activation in the periphery and entrainment of local cortical  
75 circuits via chemical and electrical synapses (1, 8).

76 While less investigated, limbic circuits show similar patterns of coordinated activity  
77 during early development, with discontinuous theta bursts (4-12 Hz) and superimposed fast  
78 episodes (20-40 Hz) in beta-gamma frequency (9-13). Theta bursts facilitate unidirectional  
79 communication from the CA1 area of intermediate/ventral hippocampus (HP) to the prelimbic  
80 subdivision of the prefrontal cortex (PFC) via glutamatergic projections (14). As a  
81 consequence of hippocampal theta drive, pyramidal neurons in local prelimbic circuits  
82 generate beta-low gamma oscillations (15). Theta coupling between neonatal PFC and HP is  
83 controlled by the lateral entorhinal cortex (LEC) that densely projects to both areas (11). The  
84 complex organization of limbic circuits at early age raises the question, which mechanisms  
85 control the gatekeeper function of LEC during early development. Similar to sensory  
86 systems, the neonatal LEC could be driven by spontaneous activity from the sensory  
87 periphery. Indeed, the adult LEC receives direct input from the olfactory bulb (OB) that, in  
88 contrast to other sensory systems, bypasses the thalamus (16, 17). Mitral and tufted cells  
89 (MTCs) represent the sole OB output neurons. Rather than simply relaying information, these  
90 neurons are embedded in a complex network that controls odor information coding (18, 19).  
91 The axons of MTCs terminate in entorhinal layer I on apical dendrites of layer II/III pyramidal

92 and stellate cells (20), which in turn form the perforant path projection to the hippocampal  
93 formation (21, 22). Layer II/III neurons in LEC project back to OB (23), yet distinct entorhinal  
94 populations are differently engaged in feedforward and feedback signaling during odor  
95 processing (24). Thereby, odor-evoked activity in the adult controls the gateway function of  
96 LEC interfacing HP and neocortical regions (25, 26).

97         While the sense of smell serves fundamental functions in newborn animals (27), the  
98 role of olfactory inputs and OB activity for limbic circuit maturation remains unknown. Since  
99 other sensory systems are still immature during early life – and thus their impact on limbic  
100 circuits is negligible – this knowledge gap appears even more striking. Rodent pups are  
101 blind, deaf and have limited sensorimotor abilities until the end of the second postnatal week  
102 (28, 29). In contrast, the olfactory system matures early and is considered to be fully  
103 functional at birth, providing the major sensory stimulus in neonatal rodents. We hypothesize  
104 that both odor-dependent and -independent coordinated activity in OB control the  
105 entrainment of entorhinal networks during neonatal development. Here, we combine  
106 optogenetics, electrophysiology, and pharmacology *in vivo* with anatomical tracing in  
107 neonatal mice (postnatal day (P) 8-10) to elucidate the olfactory control of the functional  
108 maturation of entorhinal circuits.

109

110

111 **RESULTS**

112 ***OB and LEC are reciprocally connected in neonatal mice***

113 In mice, MTCs mature during intrauterine life and their axons reach cortical targets during the  
114 first two postnatal weeks (30). This time window coincides with the period of strong gating of  
115 prefrontal-hippocampal networks by theta activity in LEC. To detail on the spatial patterns of  
116 connectivity between OB and LEC in P8-10 mice, we performed an in-depth investigation of  
117 axonal projections from MTCs to LEC and, *vice versa*, of entorhinal projections to OB. First,  
118 we used Tbet-cre;R26-tdTomato mice (n=4) for intact-brain imaging of long-range projections  
119 by electroporetic tissue clearing and confocal fluorescence microscopy (Fig 1A, B). In these  
120 mice, MTCs are genetically tagged (Fig 1C) (31). Already at P8, the lateral olfactory tract  
121 (LOT) comprising MTC axons appeared fully developed and reached the posterior part of the  
122 cerebrum, including piriform cortex (PIR) and LEC (Fig 1A, D). As previously shown in adult  
123 rats (32), MTC axons were mainly confined to layer I of neonatal LEC (Fig 1D). Retrograde  
124 tracing with Fluorogold (FG) injected into the LEC of P3-4 mice confirmed the direct  
125 connectivity (Fig 1E). No differences between dorsal and ventral OB were detected with  
126 respect to the density of MTC projections to LEC.

127 Second, we assessed the spatial organization of feedback projections from LEC to  
128 OB. Unilateral injection of FG confined to OB of P3-4 mice (n=12) led to bright fluorescent  
129 back-labeling of parental cell bodies in ipsilateral LEC that project to OB of P8-10 mice (Fig  
130 1F). Their density was lower when compared to the cells detected in ipsilateral PIR. Most  
131 labeled neurons were located in layer II and III (88.40%, 259/293, 3 pups, 11 sections). To  
132 examine the neurochemical identity of entorhinal neurons projecting to OB, we counter-  
133 stained the FG-labeled neurons for GABA and CamKII. While most OB-projecting neurons  
134 (99.66%, 292/293) were negative for GABA, hence glutamatergic, a small fraction 0.34%,  
135 1/293) was GABA-positive. Similarly, CamKII staining revealed that the large majority, but  
136 not all FG-labeled cells, were glutamatergic (data not shown). These data indicate that top-  
137 down projections from LEC to OB can be either excitatory or inhibitory, as recently described  
138 for adult mice (33).

139 Taken together, the results of morphological investigation show that afferent and  
140 efferent projections couple neonatal LEC and OB. While glutamatergic MTCs axons target  
141 entorhinal layer I, glutamatergic and few GABAergic neurons in superficial layers of LEC  
142 innervate the OB.

143 ***Continuous respiration-related activity and discontinuous theta bursts entrain the***  
144 ***neonatal OB***

145 Despite abundant data on morphological development, the functional maturation of OB is still  
146 largely unknown. In contrast to the retina and cochlea, which lack stimulus sensitivity at early  
147 stages of postnatal development and only generate spontaneous activity, the OB processes  
148 olfactory input already at birth (34). To elucidate the patterns of activity in the neonatal OB,  
149 we performed multi-site extracellular recordings of local field potential (LFP) and multiple unit  
150 activity (MUA) from the mitral cell layer in the dorsal and ventral OB of P8-10 mice *in vivo*  
151 (n=49). Signal reversal between the internal plexiform layer (IPL) and external plexiform layer  
152 (EPL), as well as the large MTC spikes served as physiological markers for confirming the  
153 position of recording electrode set according to stereotaxic coordinates. In addition, the  
154 location of Dil-labeled electrodes was confirmed after histological investigation *post mortem*  
155 (Fig 2A, S1 Fig A, B).

156 Two patterns of coordinated activity were detected in OB (Fig 2B, C). First, we  
157 recorded continuous low amplitude oscillations with slow frequency peaking at 2-4 Hz. Given  
158 their temporal correlation and frequency overlap with respiration (median frequency: 2.37 Hz,  
159 iqr: 2.12-2.70 of chest movements) (Fig 1C, D), we defined this activity as respiration-related  
160 rhythm (RR). The RR reversed at the level of MTC layer and had larger amplitudes in EPL  
161 and glomerular layer when compared to the activity in MTC layer (data not shown). Its  
162 temporal relationship to the phase of the respiratory cycle differed between layers; the peak  
163 of RR cycle in the granule cell layer (GCL) and its trough in EPL and glomerular layer  
164 correlated with exhalation. Second, we recorded discontinuous high amplitude oscillatory  
165 events with spindle shape in the neonatal OB (Fig 2B, C). These events had faster  
166 frequencies when compared to RR with a peak within theta frequency band (4-12 Hz) (Fig

167 2D). Given their resemblance in shape and frequency dynamics to previously characterized  
168 oscillatory events in neonatal cortical areas (9-11, 35), these events were classified as theta  
169 bursts.

170 As reported for adult OB, prominent spiking characterized neonatal MTCs. Analysis of  
171 single unit activity (SUA) after principal component analysis (PCA)-based sorting of units  
172 revealed that the majority (80%) of spikes occurred during theta bursts. The firing rate during  
173 bursts (median: 1.36 Hz, iqr: 0.25-3.23 Hz) was significantly ( $p=3.65 \times 10^{-7}$ , Wilcoxon signed-  
174 rank test,  $n=34$  cells from 14 animals) augmented when compared to non-bursting periods  
175 (median: 0.44 Hz, iqr: 0.09-1.48 Hz) (Fig 2E). To assess the temporal relationship between  
176 oscillatory OB rhythms and MTC firing, we estimated the coupling strength between SUA and  
177 RR as well as between SUA and theta bursts by calculating the pairwise phase consistency  
178 (PPC), a bias-free measure of rhythmic neuronal synchronization (36). Both rhythms similarly  
179 timed MTC firing (RR: median PPC: 0.21, iqr: 0.20-0.22 vs. theta burst: median PPC: 0.21,  
180 iqr: 0.20-0.21.,  $p=0.1664$ , Wilcoxon signed-rank test, 2 outliers removed,  $n=32$  cells, Fig 2F).

181 In adults, dorsal and ventral OB subdivisions have distinct physiology and function.  
182 MTC axons that originate in the dorsal OB are known to strongly project to amygdala and  
183 mediate innate odor responses, whereas ventral OB accounts for processing of learned  
184 odorants (37, 38). To assess whether distinct activity patterns entrain the dorsal vs. ventral  
185 OB at neonatal age, we compared RR and theta bursts from both subdivisions (S1 Fig). The  
186 power of RR was similar in both sub-divisions (dorsal: median  $233.12 \mu V^2$ , iqr: 153.42-  
187 418.09,  $n=7$ ; ventral: median  $335.75 \mu V^2$ , iqr: 195.91-452.52,  $n=10$ ;  $p=0.54$ , Wilcoxon rank-  
188 sum test). Similarly, theta burst occurrence (dorsal: median 4.65 bursts/min, iqr: 3.87-5.55;  
189 ventral: median 5.09 bursts/min, iqr: 4.27-5.30,  $p=0.74$ , Wilcoxon rank-sum test), duration  
190 (dorsal: median 6.76 s, iqr: 4.44-8.86 s; ventral: median 3.54 s, iqr: 1.65-5.01 s;  $p=0.09$ ,  
191 Wilcoxon rank-sum test), amplitude (dorsal: median  $73.80 \mu V$ , iqr: 59.56-75.37; ventral:  
192 median  $66.59 \mu V$ , iqr: 59.10-72.37;  $p=0.67$ , Wilcoxon rank-sum test) and relative power  
193 (dorsal: median 493.98 Hz, iqr: 430.71-763.00; ventral: median 452.63 Hz, iqr: 395.3-1071.6,  
194  $p=0.96$ , Wilcoxon rank-sum test) were comparable across OB subdivisions. These data

195 indicate that the dorsal and ventral OB show similar activity at early postnatal age. Except  
196 otherwise indicated, further investigation focused on the ventral OB subdivision, taking into  
197 account its role for learning processes in relation with the limbic system (38).

198         Coordinated patterns in the sensory periphery have been reported to critically depend  
199 on the brain state, diminishing or even disappearing in the presence of anesthetics (39, 40).  
200 In contrast, early oscillations in the developing brain have often been investigated in the  
201 presence of urethane anesthesia (9, 35, 41, 42). Rodent pups spend most of the time  
202 sleeping. The sleep-mimicking action of urethane might explain the similar patterns of  
203 neuronal activity previously observed in anesthetized and sleeping rodent pups (14, 43). To  
204 assess the urethane influence on RR and theta bursts, we recorded from both ventral (n=12)  
205 and dorsal OB (n=6) of neonatal mice before and after urethane injection. Anesthesia did not  
206 change the overall structure of OB activity, with continuous RR and discontinuous theta  
207 bursts persisting (S2 Fig A, S1 Table). Both the power of RR and the occurrence of theta  
208 bursts remained unchanged (S2B Fig). However, urethane anesthesia profoundly reduced  
209 theta burst duration (S2B Fig), augmenting those time windows lacking theta band activity  
210 and therefore, the fragmented appearance of neonatal activity in OB (S2B Fig).

211         These data indicate that, independent of OB subdivision and brain state, the neonatal  
212 OB shows two main patterns of early oscillatory activity, continuous RR activity and  
213 discontinuous theta bursts.

#### 214 ***Mechanisms underlying the generation of continuous and discontinuous oscillatory*** 215 ***activity in the neonatal OB***

216 To elucidate the mechanisms contributing to the generation of continuous RR and  
217 discontinuous theta bursts in the OB of neonatal mice, we used two experimental  
218 approaches. First, the temporal coupling between respiration and continuous 2-4 Hz  
219 oscillations in OB suggests that nasal air flow contributes to RR generation. To test this  
220 hypothesis, we reduced the nasal air flow by unilateral naris occlusion in P8-10 pups (n=12)  
221 using a previously developed protocol (44, 45). MUA and oscillatory activity of OB were  
222 recorded before and after naris occlusion with silicon adhesive (data not shown). While



223 unilateral deprivation did not change the overall structure of OB activity patterns, it reduced  
224 the RR power from 396.05  $\mu\text{V}^2$  to 293.30  $\mu\text{V}^2$  (baseline: iqr 232.58-570.88  $\mu\text{V}^2$ ; occlusion: iqr  
225 136.10-410.14  $\mu\text{V}^2$ ,  $p=0.0009$ , Wilcoxon signed-rank test). By contrast, the theta bursts in OB  
226 were not affected by naris occlusion (baseline: median: 643.45 Hz, iqr: 342.6-1009.7;  
227 occlusion: median 700.35 Hz, iqr 284.5-1240.8;  $p=0.91$ , Wilcoxon signed-rank test).  
228 Correspondingly, the firing rate during RR (baseline: median 1.18 Hz, iqr 0.26-2.45) as well  
229 as coupling strength (i.e. PPC) between units and RR (baseline: median  $8.50 \times 10^{-4}$ , iqr 0-  
230 0.0084, one outlier removed) decreased after naris occlusion (firing rate: occlusion: median  
231 0.75 Hz, iqr 0.25-1.91,  $p=0.021$ , Wilcoxon signed-rank test; coupling strength: occlusion:  
232 median  $-3.09 \times 10^{-5}$ , iqr  $-2.76 \times 10^{-4}$ - $1.56 \times 10^{-4}$ ;  $p=0.049$ , Wilcoxon signed-rank test, one outlier  
233 removed). The temporal structure (coupling strength for baseline: median  $2.09 \times 10^{-4}$ , iqr: -  
234 0.0001-0.0015; occlusion: median  $-1.19 \times 10^{-4}$ , iqr  $-3.54 \times 10^{-4}$ - $1.59 \times 10^{-4}$ ;  $p=0.19$ , Wilcoxon  
235 signed-rank test, one outlier removed) of OB firing in relationship with theta bursts remained  
236 unchanged after naris occlusion. Thus, RR activity, but not theta bursts critically depends on  
237 nasal air flow.

238 The second experimental approach aimed at assessing the role of MTCs, the OB  
239 projection neurons, to the generation of coordinated patterns of oscillatory activity. For this,  
240 we selectively manipulated MTC firing by light in P8-10 pups bred from crossing hemizygous  
241 Tbet-cre mice with R26-homozygous R26-ArchT-EGFP mice. By these means, MTCs of cre-  
242 positive mice selectively expressed the proton pump ArchT fused with EGFP. Already at P8,  
243 the fusion protein expression was robust both in MTC somata (S3A Fig) and axonal  
244 projections targeting LEC, PIR and posterior cortical amygdala (Fig 3A). Cre-negative mice  
245 were used as controls.

246 In a first experiment, we tested the efficiency of light-dependent MTC silencing in  
247 neonatal OB by performing whole-cell patch-clamp recordings from biocytin-filled EGFP-  
248 positive neurons ( $n=7$  cells) in coronal slices containing the OB of P8-10 R26-heterozygous  
249 Tbet-cre;R26-ArchT-EGFP mice ( $n=5$ ) (S3A Fig). Yellow light pulses (595 nm, 5 s, 0.2-0.6  
250 mW) triggered MTC hyperpolarization from -49.96 mV to -58.39 mV (baseline: iqr -57.28-

251 45.61 mV; light administration: iqr -63.10-48.89 mV, Wilcoxon signed-rank test,  $p=0.0078$ )  
252 and, consequently, inhibition of firing (S3B Fig). Since MTCs are strongly interconnected  
253 within local circuits, we tested whether light pulses caused MTC silencing also in the  
254 presence of synaptic inputs. To mimic such inputs, we paired the light stimulation with  
255 depolarizing current pulses of different intensities. Upon injections  $\leq 60$  pA, light stimulation  
256 still efficiently blocked action potential discharge in ArchT-EGFP-expressing MTCs (S3C  
257 Fig).

258         Next, we assessed the contribution of MTC firing to the patterns of oscillatory activity  
259 in OB by performing extracellular recordings of LFP and MUA in OB of P8-10 R26-  
260 heterozygous cre-positive ( $n=12$ ) and cre-negative ( $n=11$ ) Tbet-cre;ArchT-EGFP mice. Upon  
261 *in vivo* light stimulation (Fig 3A), the majority (64.58%, 31/48) of MTCs responded with a  
262 pronounced firing rate decrease from a median of 1.2 Hz (iqr 0.66-2.26) before to 0.45 Hz  
263 (iqr 0.13-0.99) during light exposure. None of the units augmented the firing during  
264 illumination and only few units (4.14%, 2/48) showed a post-stimulus firing increase (Fig 3D).  
265 Some units (31.25%, 15/48), most likely non-MTCs located close to the mitral cell layer, did  
266 not respond to light stimulation. Local silencing of MTCs modified the coordinated activity of  
267 OB. The properties of RR and theta bursts (theta burst power:  $p=0.23$ , Wilcoxon rank-sum  
268 test) were largely similar in cre-negative and cre-positive mice under control conditions (i.e.  
269 no light stimulation). Only the power of RR activity was slightly different (RR power:  $p=0.03$ ,  
270 Wilcoxon rank-sum test). Upon light stimulation the RR power in cre-positive pups did not  
271 change (pre stimulus: median  $92.27 \mu V^2$ , iqr 80.12-122.36; during stimulus: median  $86.99$   
272  $\mu V^2$ , iqr 71.96-100.06,  $p=0.2324$ , Wilcoxon signed-rank test, one outlier removed). In  
273 contrast, theta power in cre-positive pups significantly decreased during light stimulation (pre  
274 stimulus: median  $89.73 \mu V^2$ , iqr 57.28-100.73; during stimulus: median  $70.58 \mu V^2$ , iqr 45.70-  
275 87.91,  $p=0.0049$ , Wilcoxon signed-rank test, one outlier removed). The theta responses to  
276 light differed between cre-positive (median  $0.84 \mu V^2$ , iqr 0.81-0.89) and cre-negative pups  
277 (median  $0.99 \mu V^2$ , iqr 0.93-1.20,  $p=0.0024$ , Wilcoxon rank-sum test, 3 outliers from  
278 expression group removed), whereas for RR during light stimulus was similar in the two

279 groups (cre-positive, median 0.91, iqr 0.82-1.0; cre-negative pups median 0.96, iqr 0.93-1.05,  
280  $p= 0.3447$ , Wilcoxon rank-sum test, 1 outlier from control group, 2 outliers from expression  
281 group removed) (Fig 3E, F).

282         These data show that RR and theta bursts in the neonatal OB have different origin.  
283 While RR critically depends on nasal air flow, MTC activity is necessary for the entrainment  
284 of OB in theta bursts.

### 285 ***Theta bursts in OB drive discontinuous oscillations and time the firing in the neonatal*** 286 ***LEC***

287 The presence of both direct axonal MTC-to-LEC projections and early patterns of oscillatory  
288 activity in OB led to the question of their relevance for the emergence of functional  
289 assemblies in the neonatal LEC. In contrast to the documented relevance of entorhinal  
290 output for developing limbic circuits (11), the role of sensory inputs for the functional  
291 maturation of LEC is still unknown.

292         Multi-site extracellular recordings of LFP and MUA from the layer II/III of LEC from  
293 P8-10 mice *in vivo* ( $n=11$ ) (Fig 4A) confirmed the previously reported presence of  
294 discontinuous theta bursts with large amplitude (median 154.14  $\mu\text{V}$ , iqr 101.10-191.65) and a  
295 duration of 5.15 s (iqr 4.13-8.48) (Fig 4B-D). They appear superimposed on a slow rhythm  
296 (2-4 Hz) that continuously entrains the neonatal LEC and has been overlooked in previous  
297 investigations. This slow pattern of activity that was present both during theta bursts (median  
298 area power 526.25  $\mu\text{V}^2$ , iqr 307.68-1171.85) and “silent” periods (median area power 86.57  
299  $\mu\text{V}^2$ , iqr 52.55-344.43), temporally correlated with the simultaneously recorded respiration  
300 and was therefore, classified as entorhinal RR. These results demonstrate that the  
301 respiration-entrained brain rhythms, a powerful mechanism of long-range coupling (46),  
302 emerge early during development. Beside oscillatory patterns, neonatal LEC generates  
303 prominent firing concentrated during theta bursts (median 0.42 Hz, iqr 0.22-0.86 vs. non-  
304 bursting periods median 0.07 Hz, iqr 0.04 – 0.19,  $p=1.72 \times 10^{-10}$ , Wilcoxon signed-rank test,  
305  $n=54$  cells from 11 mice) (Fig 4E). We next assessed the coupling strength between firing  
306 and oscillatory activity. Similar fractions of entorhinal neurons were phase-locked to RR

307 (75.93%, 41/54 units) and theta bursts (61.11%, 33/54 units,  $p=0.1$ ,  $\chi^2(1)=2.7472$ ). The  
308 strength of coupling assessed by PPC was also stronger for RR (median: 0.21, iqr: 0.20-  
309 0.22) and theta (median: 0.21, iqr: 0.20-0.21,  $p=2.98 \times 10^{-4}$ , Wilcoxon rank-sum test, 4 outliers  
310 removed,  $n=50$  units), with most cells being locked to the trough of RR and theta oscillation  
311 (Fig 4F).

312 Simultaneous recordings from OB and LEC ( $n=9$ ) of neonatal mice gave first insights  
313 into their dynamic coupling (Fig 5A). While both areas showed similar oscillatory activity, their  
314 power significantly differed. Both RR power (OB: median  $143.62 \mu V^2$ , iqr 78.03-247.78; LEC:  
315 median  $109.91$ , iqr: 26.72-110.51,  $p=0.0499$ , Wilcoxon signed-rank test, 1 outlier removed)  
316 and theta power (OB: median  $193.39 \mu V^2$ , iqr 97.47-262.01, LEC: median  $112.37 \mu V^2$ , iqr  
317 43.38-127.36,  $p=0.0273$ ) were higher in OB as compared to LEC (Fig 5B). Analysis of the  
318 temporal correspondence of theta bursts in OB and LEC revealed that 48.70% of them co-  
319 occurred with more than 60% temporal overlap. The coupling strength assessed by  
320 imaginary spectral coherence, which excludes synchrony effects due to volume conductance  
321 (47), revealed that the OB-LEC coupling is evident in both slow frequencies (i.e RR) and  
322 theta band (i.e. theta bursts) (Fig 5C). In line with anatomical data, we detected no  
323 differences in the coupling of dorsal and ventral OB with LEC. Both relative occurrence of co-  
324 occurring events (dorsal: median 27.04 %, iqr 20.08–33.98 %; ventral: median 21.83 %, iqr  
325 15.66-35.14 %;  $p=0.67$ , Wilcoxon rank-sum test) and mean imaginary coherence in both RR  
326 (dorsal: median 0.11 Hz, iqr 0.09-0.14 Hz; ventral: median 0.08 Hz, iqr 0.05-0.10 Hz;  $p=0.13$ ,  
327 Wilcoxon rank-sum test) and theta frequency range (dorsal: median 0.07 Hz, iqr 0.06-0.11  
328 Hz; ventral: median 0.06 Hz, iqr 0.06- 0.09 Hz;  $p=0.54$ , Wilcoxon rank-sum test) were similar  
329 for dorsal and ventral OB in relationship to LEC (S1 Fig). These data are in line with  
330 anatomical investigations in adult mice (48) as well as with our tracing data (Fig 1), showing  
331 that, FG injections into neonatal LEC leads to homogenous MTC labeling throughout the OB.

332 To assess the influence of anesthesia on entorhinal activity patterns and coupling  
333 between LEC and OB, we recorded both areas in mouse pups before and after urethane i.p.  
334 injection ( $n=18$ ). Urethane did not change the overall spectral distribution of activity patterns

335 in LEC. As in the non-anesthetized state, RR and theta bursts were the main patterns of  
336 entorhinal activity, yet the RR power decreased and theta power augmented under urethane  
337 action (S4A Fig, S1 Table). Urethane affected the duration of theta bursts and slightly  
338 increased their occurrence (S4B Fig). The synchrony between OB and LEC varied in  
339 magnitude, but not frequency distribution. The imaginary coherence peaked at 2-4 Hz and at  
340 5 to 20 Hz, corresponding to RR and theta-beta frequencies, respectively. While mean RR  
341 coherence did not differ between states ( $p=0.17$ , Wilcoxon rank-sum test, 2 outliers  
342 removed), theta coherence was higher in the presence of urethane ( $p=0.0034$ ).

343 These data indicate that, independent of brain state and anatomical subdivision, OB  
344 and LEC couple tightly, both being synchronized in continuous RR and discontinuous theta  
345 oscillations at neonatal age.

346 Since feed-forward projections from MTCs to LEC are dense, whereas feed-back  
347 projections from LEC to OB are rather sparse, we asked whether the functional coupling  
348 between the two areas is directed, and if so, whether directionality is frequency-specific. To  
349 estimate the directionality of OB-LEC coupling, we used two approaches. First, we assessed  
350 the phase lag between LFP in OB and LEC. While the phase lag for continuous RR was  
351 centered to 0, it peaked in negative range for theta bursts, indicating that OB theta bursts  
352 most likely drive LEC theta oscillations (Fig 5D). Second, we analyzed the temporal  
353 relationship between spiking activity in one area and either LFP or spiking in the other area.  
354 For RR, a similar number of clustered units in OB and LEC were phase-locked to RR in LEC  
355 (31.48%, 17/54) and OB (25.27%, 23/91  $p=0.54$ ,  $\chi^2(1)=0.38$ ,  $\chi^2$  test of proportions),  
356 respectively and their coupling strengths were comparable ( $p=0.35$ , Wilcoxon rank-sum test,  
357 OB cells to LEC RR: median 0.21, iqr 0.19-0.23; LEC cells to OB RR: median 0.22, iqr 0.19-  
358 0.28, Fig 5E). In contrast, a significantly higher fraction of LEC neurons were phase-locked to  
359 theta bursts in OB (42.47%, 31/73) when compared to OB neurons timed by entorhinal theta  
360 phase (10.20%, 5/49,  $p=1.28 \times 10^{-4}$ ,  $\chi^2(1)=14.67$ ,  $\chi^2$  test of proportions, Fig 5E). The coupling  
361 strengths of these neuronal populations, however, were comparable ( $p=0.44$ , Wilcoxon rank-  
362 sum test, OB cells to LEC theta: median: 0.22, iqr: 0.19-0.24; LEC cells to OB theta: median:

363 0.23, iqr: 0.20-0.26, one outlier removed from OB theta-LEC units group). Notably, MTCs  
364 preferentially fire during the trough of RR activity and theta bursts in OB, whereas LEC cells  
365 preferentially fire on the rising phase after the trough of OB rhythms, indicating that MTC  
366 firing precedes LEC cell firing by about a third of a cycle (Fig 5F, G).

367 Together, these data suggest that the continuous RR rhythm is not involved in  
368 directed information flow within OB-LEC circuits, whereas theta bursts in OB drive the  
369 oscillatory entrainment of LEC.

370 ***Pharmacological blockade of OB firing diminishes the slow and fast oscillatory***  
371 ***activity but not the coupling of OB-LEC circuits***

372 To confirm the functional long-range coupling between OB and LEC, we pharmacologically  
373 abolished the neuronal activity by unilateral pressure-injection of the voltage-dependent  
374 sodium channel (hence action potential) blocker lidocaine (4% in sterile saline) into OB.  
375 Extracellular recordings of LFP and MUA were performed simultaneously from OB and LEC  
376 of mice (n=8) before and after lidocaine injection *in vivo* (Fig 6A). The injected lidocaine  
377 volume of 4  $\mu$ l was proven to not spread across the borders of OB (Fig 6B). Lidocaine  
378 abolished OB firing within ten minutes of injection from a median baseline firing rate of 1.97  
379 Hz (iqr: 0.77-2.80) to 0.00 Hz (iqr: 0.00-0.02). A partial recovery was observed after 30-40  
380 min ( $\chi^2(7)=45.04$ ,  $p=1.34 \times 10^{-7}$ , Friedman test, with Wilcoxon signed-rank post hoc test with  
381 Bonferroni correction) (Fig 6D). The firing of entorhinal neurons was also significantly  
382 reduced after lidocaine treatment in OB from a median baseline firing rate of 2.4 Hz (iqr 1.46-  
383 3.60) to 0.52 Hz (iqr 0.32-1.09) within the first 10 minutes after injection ( $\chi^2(7)=135.50$ ,  
384  $p=4.45 \times 10^{-26}$ , Friedman test, with Wilcoxon signed-rank post-hoc test with Bonferroni  
385 correction). The decrease of firing rates in both areas was accompanied by changes of  
386 oscillatory network activity. In OB, the power of RR (baseline: median 91.05  $\mu$ V<sup>2</sup>; iqr 70.66-  
387 224.40; lidocaine: median 8.88, iqr 3.90-20.16;  $p=0.0078$ , Wilcoxon signed-rank test) as well  
388 as the occurrence (baseline: median 4.76 bursts/min, iqr 3.58-5.93; lidocaine: 1.03  
389 bursts/min, iqr 0.76-1.56,  $p=0.0234$ , Wilcoxon signed-rank test), duration (baseline: median  
390 4.41 s, iqr 3.78-4.77; lidocaine: median 2.35, iqr 1.89-2.88,  $p=0.0078$ , Wilcoxon signed-rank



391 test) and power (baseline: median 202.07  $\mu\text{V}^2$ , iqr 163.62-261.95; lidocaine: median 33.19,  
392 iqr 24.14-109.00,  $p=0.0156$ , Wilcoxon signed-rank test) of theta bursts were reduced. In LEC,  
393 the power of RR (baseline: median 55.88  $\mu\text{V}^2$ , iqr 42.48-134.05; lidocaine: median 17.71, iqr  
394 9.07-53.80,  $p=0.0391$ , Wilcoxon signed-rank test) as well as the duration (baseline: median  
395 4.41 s, iqr 3.74-4.58; lidocaine: median 3.24, iqr 3.14-3.56,  $p=0.0156$ , Wilcoxon signed-rank  
396 test, one outlier removed) and power (baseline: median 148.11  $\mu\text{V}^2$ , iqr 115.76-191.62;  
397 lidocaine: median 75.50, iqr 65.99-116.63,  $p=0.0313$ , Wilcoxon signed-rank test, 2 outliers  
398 removed) of theta bursts were decreased after blockade of OB firing. While the coordinated  
399 activity substantially diminished in OB and LEC, the coupling between both areas was not  
400 affected by lidocaine. Coherence neither changed in slow frequencies (baseline: median  
401 0.08, iqr 0.05-0.11; lidocaine: median 0.14, iqr 0.08-0.24,  $p=0.25$ , Wilcoxon signed-rank test)  
402 nor in theta frequency band (baseline: median 0.11, iqr 0.07-0.16; lidocaine: median 0.14, iqr  
403 0.10-0.18,  $p=0.54$ , Wilcoxon signed-rank test) after blocking OB firing (Fig 6E).

404 These data indicate that blocking of neuronal firing in OB causes massive  
405 diminishment of coordinated activity in both OB and LEC but does not change the coupling  
406 strength between the two regions.

### 407 ***Odors boost the oscillatory activity in neonatal OB and LEC and augment their fast*** 408 ***frequency coupling***

409 In contrast to other sensory systems that lack peripheral sensitivity for environmental stimuli  
410 during early postnatal development, the olfactory system is functional at birth. Therefore, the  
411 characterized coordinated patterns of oscillatory activity, RR and theta bursts, might have a  
412 dual origin, i.e. resulting from both spontaneous and/or stimulus-evoked activation of OB  
413 neurons. To gain first insights into the relevance of environmental stimuli on oscillatory  
414 activity and long-range entrainment of OB and LEC, we exposed P8-10 mouse pups to  
415 different odors. Prominent oscillatory discharge with slow and fast frequencies as well as  
416 MUA were induced in OB by olfactometer-controlled exposure to odors, such as octanal  
417 (10%) (Fig 7A). Intriguingly, we observed odor-evoked responses also in LEC, albeit at lower  
418 magnitude. Compared to theta bursts recorded in absence of stimuli (i.e baseline) and to

419 responses to saline, these octanal-evoked responses had a higher amplitude of slow  
420 oscillations corresponding to RR both in OB ( $\chi^2(2) = 36.05$ ,  $p = 1.49 \times 10^{-8}$ , Kruskal-Wallis test,  
421 Wilcoxon rank-sum test with Bonferroni correction as post-hoc test) and LEC ( $\chi^2(2) = 13.80$ ,  
422  $p = 0.001$ , Kruskal-Wallis test, Wilcoxon rank-sum test with Bonferroni correction as post-hoc  
423 test). Similarly, octanal augmented the amplitude of theta bursts in both regions (OB:  $\chi^2(2) =$   
424  $36.30$ ,  $p = 1.31 \times 10^{-8}$ , Kruskal-Wallis test, Wilcoxon rank-sum test with Bonferroni correction as  
425 post-hoc test, LEC:  $\chi^2(2) = 20.52$ ,  $p = 0.000035$ , Kruskal-Wallis test, Wilcoxon rank-sum test  
426 with Bonferroni correction as post-hoc test) (Fig 7B, C, Table 1). In contrast to coordinated  
427 theta burst activity recorded in the absence of olfactory stimulation, evoked responses  
428 included beta band (15-30 Hz) activity. The amplitude of beta activity was significantly higher  
429 in the presence of octanal than during baseline or saline exposure both in OB ( $\chi^2(2) = 56.52$ ,  
430  $p = 5.33 \times 10^{-13}$ , Kruskal-Wallis test, Wilcoxon rank-sum test with Bonferroni correction as post-  
431 hoc test) and LEC ( $\chi^2(2) = 31.94$ ,  $p = 1.16 \times 10^{-7}$ , Kruskal-Wallis test, Wilcoxon rank-sum test  
432 with Bonferroni correction as post-hoc test) (Fig 7B, C, Table 1). The presence of odor-driven  
433 OB activity confirms the maturity of receptor cells and odor-processing mechanisms in the  
434 olfactory system at early postnatal age. Moreover, the presence of odor-driven LEC activity  
435 indicates that coordinated activity from OB drives the oscillatory entrainment of LEC. To  
436 determine which oscillatory patterns are mainly involved in these directed OB-LEC  
437 interactions, we calculated the imaginary coherence between the two areas upon exposure  
438 to either saline or octanal. While the coherence in the slow frequency band (i.e. RR) was  
439 higher for odor-triggered events as compared to baseline events, it was similar for saline and  
440 octanal ( $\chi^2(2) = 23.22$ ,  $p = 9.06 \times 10^{-6}$ , Kruskal-Wallis test, Wilcoxon rank-sum test with  
441 Bonferroni correction as post-hoc test, Fig 7D, Table 1). In contrast, the coherence in fast  
442 frequencies significantly augmented in the presence of octanal when compared to saline-  
443 evoked or baseline events (theta:  $\chi^2(2) = 43.99$ ,  $p = 2.81 \times 10^{-10}$ , Kruskal-Wallis test, Wilcoxon  
444 rank-sum test with Bonferroni correction as post-hoc test, beta:  $\chi^2(2) = 48.48$ ,  $p = 2.98 \times 10^{-11}$ ,  
445 Kruskal-Wallis test, Wilcoxon rank-sum test with Bonferroni correction as post-hoc test) (Fig  
446 7D, Table 1). These data suggest that discontinuous bursts, either spontaneous or odor-



447 induced, facilitate the long range OB-LEC coupling and boost local entrainment in beta band  
448 of entorhinal circuits.

449

450  
451**Table 1 (related to Figure 7). Quantification of odor-responses in neonatal OB-LEC networks.**

|       | OB amplitude (relative change) |                     |                     |        | LEC amplitude (relative change) |                     |                     |        | OB-LEC coherence (relative change) |                     |                     |        |
|-------|--------------------------------|---------------------|---------------------|--------|---------------------------------|---------------------|---------------------|--------|------------------------------------|---------------------|---------------------|--------|
|       | No odor                        | Saline              | Octanal             | p      | No odor                         | Saline              | Octanal             | p      | No odor                            | Saline              | Octanal             | p      |
| RR    | 1.34<br>1.00-1.61              | 2.78<br>1.17 - 3.20 | 3.41<br>2.41 - 4.50 | <0.001 | 1.59<br>1.17-3.31               | 2.27<br>1.29 -4.45  | 5.38<br>2.21 - 8.94 | =0.001 | 0.69<br>0.50-1.0                   | 1.18<br>0.76 - 1.49 | 1.38<br>0.90 - 1.73 | <0.001 |
| Theta | 1.90<br>1.05-2.93              | 4.22<br>2.72 - 6.80 | 5.79<br>3.82-14.57  | <0.001 | 2.01<br>1.48-4.43               | 1.19<br>1.48 - 2.71 | 4.87<br>2.64 - 7.18 | <0.001 | 0.71<br>0.55-0.79                  | 0.93<br>0.78 - 1.05 | 1.33<br>1.03 - 1.51 | <0.001 |
| Beta  | 1.37<br>1.14-1.68              | 2.10<br>1.62 - 3.31 | 5.61<br>4.50 - 9.79 | <0.001 | 1.52<br>1.15-2.66               | 1.76<br>1.18 - 2.34 | 3.74<br>2.60 - 6.03 | <0.001 | 0.61<br>0.42-0.76                  | 1.03<br>0.91 - 1.19 | 1.32<br>1.19 - 1.44 | <0.001 |

452  
453  
454  
455  
456  
457

The values are given as median and inter-quartile ranges and p-values (Kruskal-Wallis H test) for odor-evoked changes in oscillatory activity in RR, theta and beta band in OB and LEC, as well as OB-LEC coherence, when compared to baseline events are included.

458 **DISCUSSION**

459 Assembling of neurons into functional networks during development is the pre-requisite for  
460 behavioral performance in adults. Entrainment of neurons into coordinated oscillatory  
461 rhythms represents a powerful assembling principle that has been initially identified to control  
462 the topographic organization of sensory systems (6, 8, 49, 50). More recently, patterns of  
463 coordinated activity have been characterized in developing limbic systems (9, 14, 15, 51, 52).  
464 However, it is still unclear whether sensory and limbic circuits adhere to similar assembling  
465 principles and how they interact during early development. In the present study, we tested  
466 the hypothesis that coordinated activity patterns of neuronal assemblies in neonatal OB  
467 contribute to the oscillatory entrainment of LEC, the gatekeeper of limbic circuits during  
468 development. Combining *in vivo* electrophysiology, optogenetics and pharmacology with  
469 anatomical tracing of projections, we demonstrate that (i) two major patterns of coordinated  
470 activity entrain the neonatal OB: continuous slow frequency oscillations temporally related to  
471 respiration and discontinuous theta band oscillations critically depending on MTC activity; (ii)  
472 both rhythms temporally couple the neonatal OB and LEC via dense direct axonal  
473 projections, with OB theta bursts boosting the oscillatory entrainment of entorhinal circuits;  
474 and (iii) olfactory stimuli augment oscillatory power, induce activity in fast frequency bands,  
475 and strengthen the coupling within OB-LEC circuits (Fig 8). These data reveal that  
476 endogenously-generated and stimulus-driven activities in OB control the oscillatory  
477 entrainment of LEC.

478 Brain development has been extensively investigated in rodents because they  
479 enable insights into a time window that remains inaccessible in humans. As altricial species,  
480 rodents are born at an immature stage of brain development. They are blind, deaf, do not  
481 whisker and have limited motor abilities during the first postnatal days. Before the onset of  
482 the ability to actively respond to sensory stimuli, coordinated activity patterns, typically  
483 characterized by rhythmic burst discharge separated by periods of quiescence, emerge  
484 endogenously. Such patterns have been described in developing somatosensory, visual and  
485 auditory systems. Their onset, properties, and underlying mechanisms are relatively well

486 understood. For example, retinal waves emerge before the onset of light-sensitivity and  
487 vision as local patterns of coordinated activity mediated by gap junctions, cholinergic and  
488 glutamatergic circuits (53, 54). Retinal waves synaptically propagate along the visual tract to  
489 primary visual cortex (35, 55, 56) and are mandatory for the refinement of visual maps (57).  
490 Similarly, cochlear burst activity emerges before the onset of hearing as a result of  
491 coordinated firing and propagates along auditory pathways (58, 59). These cochlear bursts  
492 are crucial for the establishment of precise tonotopic maps (5, 49). The precision of whisker  
493 maps in the primary somatosensory cortex seems to be equally controlled by coordinated  
494 activity evolving during postnatal development (8, 60). In the absence of a sensory periphery  
495 with bursting activity before the onset of whisking, passive activation of whiskers is replayed  
496 within thalamo-cortical circuits and contributes to refinement of topographic maps (6).

497         At the same postnatal age, the olfactory system is considered to be fully mature, the  
498 sense of smell being of particular relevance for pup survival. This early maturity poses the  
499 question, whether the mechanisms of organization differ between developing olfactory  
500 pathways and other sensory systems. The present data indicate that, similar to retina or  
501 cochlea, OB generates discontinuous patterns of oscillatory activity peaking in theta  
502 frequency range. MTCs are critical mediators of theta bursts. These bursts are  
503 complemented by the continuous RR that is timed by respiration/air flow and largely  
504 independent of neuronal firing in OB. While endogenously generated discontinuous theta  
505 bursts are a common activity pattern in peripheral sensory structures, independent of system  
506 maturity (OB *versus* retina, cochlea), the continuous RR was not reported for other sensory  
507 systems. The frequency structure of network activity in neonatal OB was largely independent  
508 of the brain state. Anesthesia augmented theta but not RR power, suggesting that MTC  
509 activity is enhanced. Similarly, in adult OB, MTCs augmented odor-evoked activity, thus  
510 broadening their odor tuning under anesthesia (45, 61).

511         Overall, bursting OB activity during development profoundly differs from the  
512 oscillatory activity in adults. Supporting previous observations *in vitro* (62), we showed that  
513 neonatal MTCs are not only preferentially attuned to theta band activity but also contribute to

514 its generation. In adult mice, network activity in theta band emerges from respiration-coupled  
515 sensory input in the glomerular layer (63) and MTCs are mainly involved in the generation of  
516 fast oscillatory activity in gamma band (64-67). Similarly, fast rhythms are absent in the  
517 developing OB (68) and only in the presence of odors beta band activity was induced. The  
518 protracted emergence of fast oscillations has been hypothesized to result from late  
519 integration of OB interneurons into local circuits and from age-dependent intrinsic biophysical  
520 properties of MTCs. As a consequence, it has been postulated that the developing OB  
521 encodes only first-order (e.g. odor identity) but not second-order sensory information (e.g.  
522 odor context) (45, 69).

523         The presence of both stimulus-related and endogenous network activity raises the  
524 question, whether and, if so, how both activity types either concurrently or independently  
525 shape the maturation of the olfactory system. Already the role of spontaneous activity  
526 endogenously generated in the sensory periphery has been subject of debate. As shown for  
527 network activity in the immature retina and cochlea, discontinuous OB bursts in neonatal  
528 mice are likely to have a permissive role in the establishment of precise connectivity that is  
529 inherent in an olfactory map (70). However, it remains unclear how the spontaneous and  
530 stimulus-evoked activities create a coherent sensory representation lacking mutual  
531 perturbations. This is a unique feature of the developing OB. Spontaneous retinal waves and  
532 cochlear bursts diminish and disappear with the onset of light sensitivity and hearing.  
533 Therefore, they do not interfere with stimulus-evoked activity. Understanding the  
534 mechanisms of theta bursts and RR during early development, as initiated in the present  
535 study, will enable us to disentangle their function(s) along the olfactory pathway.

536         In sharp contrast to most sensory pathways, the olfactory system bypasses a  
537 thalamic relay and directly conveys information from OB to cortical areas. Much research  
538 focused on the PIR, where the bulbar topography is largely discarded and dense inputs from  
539 OB are integrated to form odor percepts (16, 71-73). MTC axons also target LEC and in fact  
540 these axons represent the main input that rodent LEC receives (74). LEC neurons respond to  
541 odors (75, 76) and have been proposed to act as a modulator of olfactory coding through

542 interactions with the PIR (24, 77, 78). The present results show that already at neonatal age  
543 a tight coupling links the OB with LEC. MTC axons target layer I of neonatal LEC as  
544 previously shown for adults (17, 79). These projections mediate the coupling by synchrony  
545 between the two areas as well as the early drive from OB to LEC. Remarkably, the neonatal  
546 LEC and OB show similar patterns of oscillatory activity, RR and theta bursts, albeit with  
547 lower power in LEC. The coupling by synchrony between the two areas peaked within the  
548 same frequency bands, 2-4 Hz and 4-10 Hz. Given the measures used for the assessment of  
549 synchrony it is unlikely that similarities result from volume conduction. Reflecting the more  
550 pronounced OB-to-LEC innervation as compared with *vice versa* projections, the entorhinal  
551 firing was stronger timed by the phase of RR and theta bursts in the OB than the OB firing  
552 was driven by the entorhinal activity. Interestingly, lidocaine blockade of MTC firing did not  
553 abolish the coupling between OB and LEC, suggesting that alternative pathways might  
554 contribute to the synchrony between the two areas.

555         While feedback projections from LEC to OB (and piriform cortex, not shown) emerge  
556 early in life, their function seems to mature postnatally to reach the anticipatory top-down  
557 modulation and optimal input discrimination that have been identified at adult stage (80).  
558 Recent findings revealed that the cellular substrate of feedforward and feedback interactions  
559 between OB, LEC and PIR of adult mice are highly complex (24). We hypothesize that,  
560 under the influence of excitatory inputs from OB, the local entorhinal circuitry is activated.  
561 The MTC target neurons in LEC are mainly glutamatergic, suggesting that coordinated OB  
562 activity causes an overall excitation in LEC that might facilitate the formation and refinement  
563 of local circuits.

564         Olfactory information reaches the adult HP (CA1 and dentate gyrus) via reelin-  
565 positive neurons in LEC (24, 81). Along these axonal projections, the oscillatory activity is  
566 synchronized and enables directed functional interactions between OB, LEC and HP. In turn,  
567 HP unidirectionally projects to PFC. At the functional level, the communication across areas  
568 involves oscillatory activity that temporally coordinates the neuronal assemblies. For  
569 example, respiration-related slow activity, even if subject to debate regarding its relationship

570 to previously described slow rhythms (82), has recently been found to occur simultaneously  
571 with theta oscillations (83) and moreover entrain faster beta and gamma oscillations in LEC,  
572 HP, and PFC (46, 84, 85). Taking into account the role of HP and PFC for cognitive  
573 processing (86), the OB activity that directly entrains the limbic circuit via LEC activation  
574 might represent a powerful control mechanisms of memory and executive performance of  
575 adult (87, 88).

576 It is tempting to speculate about the potential functions of OB-driven entrainment of  
577 LEC during neonatal development, before the emergence of cognitive abilities. Our previous  
578 results demonstrated that LEC acts as gatekeeper of prefrontal-hippocampal interactions  
579 shortly after birth (11). Discontinuous theta bursts in LEC drive the oscillatory entrainment  
580 and time the firing of both prelimbic subdivision of PFC and CA1 area of the  
581 intermediate/ventral HP. Here we show that MTC-dependent theta activity of neonatal OB  
582 boosts RR and theta bursts in LEC. On the other hand, olfactory stimuli elicit even faster  
583 entrainment of OB-LEC circuitry, with beta band oscillations being only detectable in the  
584 presence of odors, such as octanal. An important issue that remains to be elucidated is  
585 whether specific scents that the pups naturally encounter during development, such as  
586 maternal odors, shape the network function even stronger than “artificial” odors. The effects  
587 of maternal odor on physical, neuroendocrine, and behavioral development of pups has been  
588 extensively investigated (27, 89, 90), yet very little is known about the underlying cellular and  
589 circuit mechanisms. We propose that endogenously generated and odor-evoked OB activity,  
590 especially as a result of maternal odor, might increase the level of excitability within  
591 entorhinal-prelimbic-hippocampal networks and strengthen their wiring. By these means, the  
592 olfactory system could facilitate the postnatal maturation of limbic circuitry and, ultimately, the  
593 emergence of cognitive abilities.

594

595 **MATERIALS AND METHODS**

596 **Ethics statement.** All experiments were performed in compliance with the German laws and  
597 the guidelines of the European Union for the use of animals in research and were approved  
598 by the local ethical committee (15/17).

599 **Experimental model and subject details**

600 *Mice.* Timed-pregnant C57Bl/6J and Tbet-cre mice from the animal facility of the University  
601 Medical Center Hamburg-Eppendorf as well as B6.Cg-Gt(ROSA)26Sor<sup>tm40.1(CAG-aop3/EGFP)Hze/J</sup>  
602 mice (Ai40(RCL-ArchT-EGFP)-D, Jackson Laboratory, stock no: 02118), and Tbet-cre;ArchT-  
603 EGFP mice (bred by the animal facility of the University Medical Center Hamburg-Eppendorf)  
604 were housed individually in breeding cages at a 12 h light / 12 h dark cycle and fed *ad*  
605 *libitum*. Mouse lines used for CLARITY experiments (Tbet-cre mice, B6.Cg-  
606 Gt(ROSA)26Sor<sup>tm9(CAG-tdTomato)Hze/J</sup> (Ai9(RCL-tdT), Jackson Laboratory, stock no: 007909 and  
607 Tbet-cre;tdT mice) were bred in the animal facility at RWTH Aachen University under similar  
608 conditions. The day of vaginal plug detection was defined E0.5, while the day of birth was  
609 assigned as P0. Male mice underwent sensory manipulation, light stimulation,  
610 pharmacological treatment and multi-site electrophysiological recordings at P8-10. For  
611 CLARITY experiments, male and female mice were used. Genotypes were determined using  
612 genomic DNA and following primer sequence (Metabion, Planegg/Steinkirchen, Germany: for  
613 Cre in Ai40(RCL-ArchT-EGFP)-D mice: PCR forward primer 5'-  
614 ATCCGAAAAGAAAACGTTGA-3' and reverse primer 5'-ATCCAGGTTACGGATATAGT-3';  
615 for ROSA26-wt PCR forward primer 5'-AAAGTCGCTCTGAGTTGTTAT-3' and reverse  
616 primer 5'-GGAGCGGGAGAAATGGATATG-3'; for GFP-tg PCR forward primer 5'-  
617 CTGGTCGAGCTGGACGGCGACG-3' and reverse primer 5'-  
618 GTAGGTCAGGGTGGTCACGAG-3'; for Cre in Ai9(RCL-tdT) mice: forward primer 5'  
619 CATGTCCATCAGGTTCTTGC 3' and reverse primer 5' AGAGAAAGCCCAGGAGCAG 3'; for  
620 tdTomato forward primer 5' GGCATTAAGCAGCGTATCC 3' and reverse primer 5'  
621 CTGTTCTGTACGGCATGG 3'. The PCR reactions were as follows: 10 min at 95°C, 30  
622 cycles of 45 s at 95°C, 90 s at 54°C, 90 s at 72°C, followed by a final extension step of 10



623 min at 72°C (Cre-tg and ROSA26-wt), 10 min at 95°C, 30 cycles of 45 s at 95°C, 90 s at  
624 68°C, 90 s at 72°C, followed by a final extension step of 10 min at 72°C (GFP-tg). In addition  
625 to genotyping, EGFP expression in OB prior to surgery was detected using a dual fluorescent  
626 protein flashlight (Electron microscopy sciences, PA, US).

### 627 ***Surgical procedures***

628 *Surgical preparation for electrophysiology and light delivery in vitro.* For patch-clamp  
629 recordings, pups were decapitated and brains were sliced in 300 µm-thick coronal sections.  
630 Slices were incubated in oxygenated ACSF containing (in mM) 119 NaCl, 2.5 KCl, 1  
631 NaH<sub>2</sub>PO<sub>4</sub>, 26.2 NaHCO<sub>3</sub>, 11 glucose, 1.3 MgSO<sub>4</sub> (320 mOsm) at 37 °C. Prior to recordings,  
632 slices were maintained at room temperature and superfused with oxygenated ACSF.

633 *Surgical preparation for electrophysiology and light delivery in vivo.* For recordings in non-  
634 anesthetized state, 0.5% bupivacain / 1% lidocaine was locally applied on the neck muscles.  
635 For recordings under anesthesia, mice were injected i.p. with urethane (1 mg/g body weight;  
636 Sigma-Aldrich, MO, USA) prior to surgery. For both groups, under isoflurane anesthesia  
637 (induction: 5%, maintenance: 2.5%) the head of the pup was fixed into a stereotaxic  
638 apparatus as previously reported (9).

639 The surgery protocols are described in detail in Supplemental Information.

### 640 ***Electrophysiology***

641 *Electrophysiological recordings in vivo.* One-shank electrodes (NeuroNexus, MI, USA) with  
642 16 recording sites were inserted into dorsal (depth 0.5-1.2 mm, angle 0°) or ventral OB (1.4-  
643 1.8 mm, angle 0°) as well as in LEC (depth: 2 mm, angle: 10° from the vertical plane). Two-  
644 shank optoelectrodes (Buzsaki16-OA16LP, NeuroNexus, MI, USA) with 8 recordings sites on  
645 each shank aligned with an optical fiber ending 40 µm above the top recording site were  
646 inserted into ventral OB. Extracellular signals were band-pass filtered (0.1 Hz – 9 kHz) and  
647 digitized (32 kHz) by a multichannel amplifier (Digital Lynx SX; Neuralynx, Bozeman, MO;  
648 USA) and Cheetah acquisition software (Neuralynx).

649 *Electrophysiological recordings in vitro.* Whole-cell patch-clamp recordings were performed  
650 from MTCs identified by their location in the mitral cell layer and visualized by membrane-  
651 bound EGFP. All recordings were performed at room temperature. Recording electrodes (4-9  
652 MΩ) were filled with K-gluconate based solution containing (in mM): 130 K-gluconate, 10  
653 HEPES, 0.5 EGTA, 4 Mg-ATP, 0.3 Na-GTP, 8 NaCl (285 mOsm, pH 7.4) and 0.5% biocytin  
654 for post-hoc morphological identification of recorded cells. Recordings were controlled with  
655 the Ephys software (91) in the MATLAB environment (The MathWorks, Inc., MA, USA).

### 656 ***Morphological investigation***

657 *CLARITY.* Brains from neonatal mice of both sexes were sliced in 1 mm- (for LEC) and 500  
658 μm-thick (for OB) coronal sections. To maintain the structural integrity, the tissue was fixed  
659 overnight at 4°C in hydrogel fixation solution containing 4% acrylamide, 0.05% bis-  
660 acrylamide, 0.25% VA-044 Initiator, 4% PFA in PBS-/. After polymerization and embedding  
661 the nuclear marker DRAQ5 (1:1000) was added to the samples. After washing steps, the  
662 samples were incubated for 24 h in RIMS80 containing 80 g Nycodenz, 20 mM PS, 0.1%  
663 Tween 20, and 0.01% sodium acid.

664 *Retrograde tracing.* For retrograde tracing, anesthetized P3-4 mice received unilateral  
665 Fluorogold (FG) (Fluorochrome, LLC, USA) injections into OB (0.8 mm anterior from the  
666 fronto-nasal suture, 0.8 mm from midline) or LEC (1 mm posterior to bregma, 5 mm from  
667 midline). After 4-5 days, pups were deeply anesthetized and perfused at P8.

668 All staining protocols are described in detail in Supplemental Information.

### 669 ***Manipulations***

670 *Light stimulation in vitro.* Whole-cell current-clamp recordings were performed from ArchT-  
671 EGFP expressing mitral cells in coronal slices of the neonatal Tbet-cre;ArchT mice. Yellow  
672 light pulses (595 nm) of different light intensities (0.2 – 2.6 mW) were applied to test the  
673 effect on the membrane potential.

674 *Light stimulation in vivo.* Trapezoid light stimulation was applied using a diode pumped solid  
675 state (DPSS) laser (Cobolt Mambo, 594 nm, Omicron, Austria), controlled by an Arduino Uno  
676 (Arduino, Italy).

677 *Naris occlusion.* One naris was closed using silicon adhesive (Kwik-Sil, World Precision  
678 Instruments). After a recovery period of five minutes, the recording was pursued while one  
679 naris was sealed.

680 *Pharmacological inactivation.* To block the firing of OB neurons, lidocaine hydrochloride 4%  
681 in 0.9% NaCl, pH 7.0 with NaOH) was slowly infused into the OB

682 *Odor stimulation.* An eight channel dilution olfactometer (Aurora Scientific) was used for  
683 stimulus delivery.

684 All manipulation protocols are described in detail in Supplemental Information.

### 685 ***Quantification and statistical analysis***

686 *Immunohistochemistry quantification.* Images were analyzed using ImageJ.

687 *Detection of respiration frequency.* Respiration was monitored using a piezo-electric sensor  
688 placed under the pup's chest.

689 *LFP analysis.* Data were analyzed offline using custom-written scripts in the MATLAB  
690 environment (Version 9, MathWorks, Natick, MA).

691 For details, see Supplemental Information.

692 *Statistics.* Statistical analysis was performed using SPSS Statistics 22 (IBM, NY) or  
693 MATLAB. Gaussian distribution of the data was assessed using the Kolmogorov-Smirnov  
694 test. None of the data sets were normally distributed. Therefore, data were tested for  
695 significance using Wilcoxon signed-rank test (2 related samples), Wilcoxon rank-sum test (2  
696 unrelated samples), Friedman test (>2 related samples; Wilcoxon signed-rank post hoc test  
697 with Bonferroni correction) and Kruskal-Wallis H test (>2 unrelated samples; Wilcoxon rank-  
698 sum test post hoc test with Bonferroni correction). Differences in proportions were tested  
699 using  $\chi^2$  test. For classification of single unit responses to light stimulation, significant firing

700 rate changes were assessed statistically using Wilcoxon signed-rank test. Data are  
701 represented as median and inter-quartile range.

702

703 **Acknowledgments**

704 We thank A. Marquardt, C.H. Engelhardt, P. Putthoff, A. Dahlmann for excellent technical  
705 assistance, I. Hermans-Borgmeyer for help with mouse breeding, and F. Kutchera and T.  
706 Renz for optimization of the setup and olfactometer.

707 I.L.H.-O. acknowledges support by the ERC (ERC Consolidator Grant 681577) and by the  
708 German Research Foundation (Ha4466/10-1, SFB 936 (B5) and SPP 1665 (Ha4466/12-1)).

709 M.S acknowledges support by the German Research Foundation (SP724/10-1). A.M.T. was  
710 enrolled in the NSF-funded exchange program of International Program for the Advancement  
711 of Neurotechnology (IPAN) of Univ. of Michigan. M.S. is a Lichtenberg-Professor of the  
712 Volkswagen Foundation.

713 I.L.H.-O. and M.S. are members of the FENS Kavli Network of Excellence

714 **Author contributions**

715 I.L.H.-O. designed the experiments, S.G, J.K.K., H.H., K.W., D.F., A.M.T carried out the  
716 experiments, S.G., J.K.K., H.H., K.W. analyzed the data, I.L.H.-O. S.G., J.K.K. and M.S.  
717 interpreted the data and wrote the paper. All authors discussed and commented on the  
718 manuscript.

719

720

721 **REFERENCES**

- 722 1. Hanganu-Opatz IL. Between molecules and experience: role of early patterns of coordinated  
723 activity for the development of cortical maps and sensory abilities. *Brain research reviews*.  
724 2010;64(1):160-76.
- 725 2. Blankenship AG, Feller MB. Mechanisms underlying spontaneous patterned activity in  
726 developing neural circuits. *Nat Rev Neurosci*. 2010;11(1):18-29.
- 727 3. Luhmann HJ, Khazipov R. Neuronal activity patterns in the developing barrel cortex.  
728 *Neuroscience*. 2018;368:256-67.
- 729 4. Colonnese MT, Kaminska A, Minlebaev M, Milh M, Bloem B, Lescure S, et al. A conserved  
730 switch in sensory processing prepares developing neocortex for vision. *Neuron*. 2010;67(3):480-98.
- 731 5. Wang HC, Bergles DE. Spontaneous activity in the developing auditory system. *Cell and*  
732 *tissue research*. 2015;361(1):65-75.
- 733 6. Minlebaev M, Colonnese M, Tsintsadze T, Sirota A, Khazipov R. Early gamma oscillations  
734 synchronize developing thalamus and cortex. *Science*. 2011;334(6053):226-9.
- 735 7. Tiriac A, Uitermarkt BD, Fanning AS, Sokoloff G, Blumberg MS. Rapid whisker movements in  
736 sleeping newborn rats. *Current biology : CB*. 2012;22(21):2075-80.
- 737 8. Dupont E, Hanganu IL, Kilb W, Hirsch S, Luhmann HJ. Rapid developmental switch in the  
738 mechanisms driving early cortical columnar networks. *Nature*. 2006;439(7072):79-83.
- 739 9. Brockmann MD, Poschel B, Cichon N, Hanganu-Opatz IL. Coupled oscillations mediate  
740 directed interactions between prefrontal cortex and hippocampus of the neonatal rat. *Neuron*.  
741 2011;71(2):332-47.
- 742 10. Cichon NB, Denker M, Grün S, Hanganu-Opatz IL. Unsupervised classification of neocortical  
743 activity patterns in neonatal and pre-juvenile rodents. *Frontiers in Neural Circuits*. 2014;8.
- 744 11. Hartung H, Brockmann MD, Poschel B, De Feo V, Hanganu-Opatz IL. Thalamic and  
745 Entorhinal Network Activity Differently Modulates the Functional Development of Prefrontal-  
746 Hippocampal Interactions. *J Neurosci*. 2016;36(13):3676-90.
- 747 12. Marguet SL, Le-Schulte VT, Merseburg A, Neu A, Eichler R, Jakovcevski I, et al. Treatment  
748 during a vulnerable developmental period rescues a genetic epilepsy. *Nature medicine*.  
749 2015;21(12):1436-44.
- 750 13. Mohns EJ, Blumberg MS. Synchronous bursts of neuronal activity in the developing  
751 hippocampus: Modulation by active sleep, and association with emerging gamma and theta rhythms. *J*  
752 *Neurosci*. 2008;28(40):10134-44.
- 753 14. Ahlbeck J, Song L, Chini M, Bitzenhofer SH, Hanganu-Opatz IL. Glutamatergic drive along the  
754 septo-temporal axis of hippocampus boosts prelimbic oscillations in the neonatal mouse. *eLife*.  
755 2018;7.
- 756 15. Bitzenhofer SH, Ahlbeck J, Wolff A, Wiegert JS, Gee CE, Oertner TG, et al. Layer-specific  
757 optogenetic activation of pyramidal neurons causes beta-gamma entrainment of neonatal networks.  
758 *Nature Communications*. 2017;8.
- 759 16. Sosulski DL, Lissitsyna MV, Cutforth T, Axel R, Datta SR. Distinct Representations of  
760 Olfactory Information in Different Cortical Centers. *Nature*. 2011;472(7342):213-6.
- 761 17. Witter MP, Doan TP, Jacobsen B, Nilssen ES, Ohara S. Architecture of the Entorhinal Cortex  
762 A Review of Entorhinal Anatomy in Rodents with Some Comparative Notes. *Frontiers in Systems*  
763 *Neuroscience*. 2017;11.
- 764 18. Adam Y, Mizrahi A. Long-term imaging reveals dynamic changes in the neuronal composition  
765 of the glomerular layer. *J Neurosci*. 2011;31(22):7967-73.
- 766 19. Wachowiak M, Shipley MT. Coding and synaptic processing of sensory information in the  
767 glomerular layer of the olfactory bulb. *Seminars in cell & developmental biology*. 2006;17(4):411-23.
- 768 20. Luskin MB, Price JL. The topographic organization of associational fibers of the olfactory  
769 system in the rat, including centrifugal fibers to the olfactory bulb. *The Journal of comparative*  
770 *neurology*. 1983;216(3):264-91.
- 771 21. Agster KL, Burwell RD. Cortical efferents of the perirhinal, postrhinal, and entorhinal cortices  
772 of the rat. *Hippocampus*. 2009;19(12):1159-86.
- 773 22. Witter MP. The perforant path: projections from the entorhinal cortex to the dentate gyrus.  
774 *Progress in brain research*. 2007;163:43-61.
- 775 23. Chapuis J, Cohen Y, He X, Zhang Z, Jin S, Xu F, et al. Lateral entorhinal modulation of  
776 piriform cortical activity and fine odor discrimination. *J Neurosci*. 2013;33(33):13449-59.
- 777 24. Leitner FC, Melzer S, Lutcke H, Pinna R, Seeburg PH, Helmchen F, et al. Spatially segregated  
778 feedforward and feedback neurons support differential odor processing in the lateral entorhinal cortex.  
779 *Nature neuroscience*. 2016;19(7):935-44.

- 780 25. Eichenbaum H. A cortical-hippocampal system for declarative memory. *Nat Rev Neurosci.*  
781 2000;1(1):41-50.
- 782 26. Keene CS, Bladon J, McKenzie S, Liu CD, O'Keefe J, Eichenbaum H. Complementary  
783 Functional Organization of Neuronal Activity Patterns in the Perirhinal, Lateral Entorhinal, and Medial  
784 Entorhinal Cortices. *J Neurosci.* 2016;36(13):3660-75.
- 785 27. Logan DW, Brunet LJ, Webb WR, Cutforth T, Ngai J, Stowers L. Learned recognition of  
786 maternal signature odors mediates the first suckling episode in mice. *Current biology : CB.*  
787 2012;22(21):1998-2007.
- 788 28. Welker WI. Analysis of Sniffing of the Albino Rat 1)1964. 223-44 p.
- 789 29. Whishaw I, Kolb B. *The Behavior of the Laboratory Rat: A Handbook with Tests.* New York,  
790 NY, US: Oxford University Press; 2005. 1-520 p.
- 791 30. Walz A, Omura M, Mombaerts P. Development and topography of the lateral olfactory tract in  
792 the mouse: imaging by genetically encoded and injected fluorescent markers. *Journal of neurobiology.*  
793 2006;66(8):835-46.
- 794 31. Haddad R, Lanjuin A, Madisen L, Zeng H, Murthy VN, Uchida N. Olfactory cortical neurons  
795 read out a relative time code in the olfactory bulb. *Nature neuroscience.* 2013;16(7):949-57.
- 796 32. Wouterlood FG, Nederlof J. Terminations of olfactory afferents on layer II and III neurons in  
797 the entorhinal area: degeneration-Golgi-electron microscopic study in the rat. *Neuroscience letters.*  
798 1983;36(2):105-10.
- 799 33. Mazo C. *GABAergic Signaling in Cortical Feedback to the Olfactory Bulb.* Paris: Université  
800 Pierre and Marie Curie; 2017.
- 801 34. Wilson DA, Sullivan RM. Cortical processing of odor objects. *Neuron.* 2011;72(4):506-19.
- 802 35. Hanganu IL, Ben-Ari Y, Khazipov R. Retinal waves trigger spindle bursts in the neonatal rat  
803 visual cortex. *Journal of Neuroscience.* 2006;26(25):6728-36.
- 804 36. Vinck M, van Wingerden M, Womelsdorf T, Fries P, Pennartz CM. The pairwise phase  
805 consistency: a bias-free measure of rhythmic neuronal synchronization. *NeuroImage.* 2010;51(1):112-  
806 22.
- 807 37. Miyamichi K, Amat F, Moussavi F, Wang C, Wickersham I, Wall NR, et al. Cortical  
808 representations of olfactory input by trans-synaptic tracing. *Nature.* 2011;472(7342):191-6.
- 809 38. Mori K, Sakano H. How is the olfactory map formed and interpreted in the mammalian brain?  
810 *Annu Rev Neurosci.* 2011;34:467-99.
- 811 39. Li A, Zhang L, Liu M, Gong L, Liu Q, Xu F. Effects of Different Anesthetics on Oscillations in  
812 the Rat Olfactory Bulb. *Journal of the American Association for Laboratory Animal Science : JAALAS.*  
813 2012;51(4):458-63.
- 814 40. Mooney R, Penn AA, Gallego R, Shatz CJ. Thalamic Relay of Spontaneous Retinal Activity  
815 Prior to Vision. *Neuron.* 1996;17(5):863-74.
- 816 41. Minlebaev M, Ben-Ari Y, Khazipov R. NMDA Receptors Pattern Early Activity in the  
817 Developing Barrel Cortex In Vivo. *Cereb Cortex.* 2009;19(3):688-96.
- 818 42. Yang JW, Hanganu-Opatz IL, Sun JJ, Luhmann HJ. Three Patterns of Oscillatory Activity  
819 Differentially Synchronize Developing Neocortical Networks In Vivo. *Journal of Neuroscience.*  
820 2009;29(28):9011-25.
- 821 43. Bitzenhofer SH, Sieben K, Siebert KD, Spehr M, Hanganu-Opatz IL. Oscillatory activity in  
822 developing prefrontal networks results from theta-gamma-modulated synaptic inputs. *Cell reports.*  
823 2015;11(3):486-97.
- 824 44. Franks KM, Isaacson JS. Synapse-Specific Downregulation of NMDA Receptors by Early  
825 Experience: A Critical Period for Plasticity of Sensory Input to Olfactory Cortex. *Neuron.*  
826 2005;47(1):101-14.
- 827 45. Kato Hiroyuki K, Chu Monica W, Isaacson Jeffrey S, Komiyama T. Dynamic Sensory  
828 Representations in the Olfactory Bulb: Modulation by Wakefulness and Experience. *Neuron.*  
829 2012;76(5):962-75.
- 830 46. Tort ABL, Brankač J, Draguhn A. Respiration-Entrained Brain Rhythms Are Global but Often  
831 Overlooked. *Trends in Neurosciences.* 2018;41(4):186-97.
- 832 47. Nolte G, Bai O, Wheaton L, Mari Z, Vorbach S, Hallett M. Identifying true brain interaction from  
833 EEG data using the imaginary part of coherency. *Clinical Neurophysiology.* 2004;115(10):2292-307.
- 834 48. Hintiryan H, Gou L, Zingg B, Yamashita S, Lyden HM, Song MY, et al. Comprehensive  
835 connectivity of the mouse main olfactory bulb: analysis and online digital atlas. *Frontiers in*  
836 *neuroanatomy.* 2012;6:30.
- 837 49. Clause A, Kim G, Sonntag M, Weisz Catherine JC, Vetter Douglas E, RübSamen R, et al. The  
838 Precise Temporal Pattern of Prehearing Spontaneous Activity Is Necessary for Tonotopic Map  
839 Refinement. *Neuron.* 2014;82(4):822-35.
- 840 50. Huberman AD, Speer CM, Chapman B. Spontaneous retinal activity mediates development of  
841 ocular dominance columns and binocular receptive fields in v1. *Neuron.* 2006;52(2):247-54.



- 842 51. Del Rio-Bermudez C, Kim J, Sokoloff G, Blumberg MS. Theta Oscillations during Active Sleep  
843 Synchronize the Developing Rubro-Hippocampal Sensorimotor Network. *Current Biology*.  
844 2017;27(10):1413-24.e4.
- 845 52. Picardo Michel A, Guigue P, Bonifazi P, Batista-Brito R, Allene C, Ribas A, et al. Pioneer  
846 GABA Cells Comprise a Subpopulation of Hub Neurons in the Developing Hippocampus. *Neuron*.  
847 2011;71(4):695-709.
- 848 53. Feller MB, Wellis DP, Stellwagen D, Werblin FS, Shatz CJ. Requirement for cholinergic  
849 synaptic transmission in the propagation of spontaneous retinal waves. *Science*.  
850 1996;272(5265):1182-7.
- 851 54. Wong WT, Myhr KL, Miller ED, Wong RO. Developmental changes in the neurotransmitter  
852 regulation of correlated spontaneous retinal activity. *J Neurosci*. 2000;20(1):351-60.
- 853 55. Ackman JB, Burbridge TJ, Crair MC. Retinal waves coordinate patterned activity throughout  
854 the developing visual system. *Nature*. 2012;490(7419):219-25.
- 855 56. Colonnese MT, Khazipov R. 'Slow activity transients' in infant rat visual cortex: a spreading  
856 synchronous oscillation patterned by retinal waves. *The Journal of neuroscience : the official journal of*  
857 *the Society for Neuroscience*. 2010;30(12):4325-37.
- 858 57. Ackman JB, Crair MC. Role of emergent neural activity in visual map development. *Curr Opin*  
859 *Neurobiol*. 2014;24:166-75.
- 860 58. Tritsch NX, Bergles DE. Developmental regulation of spontaneous activity in the Mammalian  
861 cochlea. *J Neurosci*. 2010;30(4):1539-50.
- 862 59. Tritsch NX, Yi E, Gale JE, Glowatzki E, Bergles DE. The origin of spontaneous activity in the  
863 developing auditory system. *Nature*. 2007;450(7166):50-5.
- 864 60. Mitrukina O, Suchkov D, Khazipov R, Minlebaev M. Imprecise Whisker Map in the Neonatal  
865 Rat Barrel Cortex. *Cereb Cortex*. 2015;25(10):3458-67.
- 866 61. Rinberg D, Koulakov A, Gelperin A. Sparse odor coding in awake behaving mice. *J Neurosci*.  
867 2006;26(34):8857-65.
- 868 62. Yu Y, Burton SD, Tripathy SJ, Urban NN. Postnatal development attunes olfactory bulb mitral  
869 cells to high-frequency signaling. *J Neurophysiol*. 2015;114(5):2830-42.
- 870 63. Wachowiak M. All in a sniff: olfaction as a model for active sensing. *Neuron*. 2011;71(6):962-  
871 73.
- 872 64. Bathellier B, Lagier S, Faure P, Lledo PM. Circuit properties generating gamma oscillations in  
873 a network model of the olfactory bulb. *J Neurophysiol*. 2006;95(4):2678-91.
- 874 65. Fukunaga I, Herb JT, Kollo M, Boyden ES, Schaefer AT. Independent control of gamma and  
875 theta activity by distinct interneuron networks in the olfactory bulb. *Nature neuroscience*.  
876 2014;17(9):1208-16.
- 877 66. Kay LM. Circuit oscillations in odor perception and memory. *Progress in brain research*.  
878 2014;208:223-51.
- 879 67. Lepousez G, Lledo PM. Odor discrimination requires proper olfactory fast oscillations in awake  
880 mice. *Neuron*. 2013;80(4):1010-24.
- 881 68. Fletcher ML, Smith AM, Best AR, Wilson DA. High-Frequency Oscillations Are Not Necessary  
882 for Simple Olfactory Discriminations in Young Rats. *J Neurosci*. 2005;25(4):792-8.
- 883 69. Cury KM, Uchida N. Robust odor coding via inhalation-coupled transient activity in the  
884 mammalian olfactory bulb. *Neuron*. 2010;68(3):570-85.
- 885 70. Yu CR, Power J, Barnea G, O'Donnell S, Brown HEV, Osborne J, et al. Spontaneous Neural  
886 Activity Is Required for the Establishment and Maintenance of the Olfactory Sensory Map. *Neuron*.  
887 2004;42(4):553-66.
- 888 71. Boyd AM, Sturgill JF, Poo C, Isaacson JS. Cortical feedback control of olfactory bulb circuits.  
889 *Neuron*. 2012;76(6):1161-74.
- 890 72. Haberly LB. Parallel-distributed Processing in Olfactory Cortex: New Insights from  
891 Morphological and Physiological Analysis of Neuronal Circuitry. *Chemical Senses*. 2001;26(5):551-76.
- 892 73. Kay L, Laurent G. Kay, L.M. & Laurent, G. Odor- and context-dependent modulation of mitral  
893 cell activity in behaving rats. *Nat. Neurosci*. 2, 1003-1009 1999. 1003-9 p.
- 894 74. Kerr KM, Agster KL, Furtak SC, Burwell RD. Functional neuroanatomy of the parahippocampal  
895 region: the lateral and medial entorhinal areas. *Hippocampus*. 2007;17(9):697-708.
- 896 75. Petrucci A, Alvarez P, Eichenbaum H. Neural correlates of social odor recognition and the  
897 representation of individual distinctive social odors within entorhinal cortex and ventral subiculum.  
898 *Neuroscience*. 2005;130(1):259-74.
- 899 76. Young BJ, Otto T, Fox GD, Eichenbaum H. Memory representation within the  
900 parahippocampal region. *J Neurosci*. 1997;17(13):5183-95.
- 901 77. Chen CF, Barnes DC, Wilson DA. Generalized vs. stimulus-specific learned fear differentially  
902 modifies stimulus encoding in primary sensory cortex of awake rats. *J Neurophysiol*.  
903 2011;106(6):3136-44.



- 904 78. Xu W, Wilson DA. Odor-evoked activity in the mouse lateral entorhinal cortex. *Neuroscience*.  
905 2012;223:12-20.
- 906 79. Burwell RD, Amaral DG. Cortical afferents of the perirhinal, postrhinal, and entorhinal cortices  
907 of the rat. *The Journal of comparative neurology*. 1998;398(2):179-205.
- 908 80. Kay LM, Freeman WJ. Bidirectional processing in the olfactory-limbic axis during olfactory  
909 behavior. *Behavioral neuroscience*. 1998;112(3):541-53.
- 910 81. Burwell RD, Witter MP, Amaral DG. Perirhinal and postrhinal cortices of the rat: a review of the  
911 neuroanatomical literature and comparison with findings from the monkey brain. *Hippocampus*.  
912 1995;5(5):390-408.
- 913 82. Bagur S, Benchenane K. Taming the oscillatory zoo in the hippocampus and neo-cortex: a  
914 review of the commentary of Lockmann and Tort on Roy et al. *Brain structure & function*.  
915 2018;223(1):5-9.
- 916 83. Tort ABL, Ponsel S, Jessberger J, Yanovsky Y, Brankack J, Draguhn A. Parallel detection of  
917 theta and respiration-coupled oscillations throughout the mouse brain. *Scientific reports*.  
918 2018;8(1):6432.
- 919 84. Biskamp J, Bartos M, Sauer JF. Organization of prefrontal network activity by respiration-  
920 related oscillations. *Scientific reports*. 2017;7:45508.
- 921 85. Lockmann ALV, Laplagne DA, Tort ABL. Olfactory bulb drives respiration-coupled beta  
922 oscillations in the rat hippocampus. *Eur J Neurosci*. 2017.
- 923 86. Nadel L, O'Keefe J. *The hippocampus as a cognitive map*: Clarendon; 1978.
- 924 87. Egorov AV, Hamam BN, Fransén E, Hasselmo ME, Alonso AA. Graded persistent activity in  
925 entorhinal cortex neurons. *Nature*. 2002;420(6912):173-8.
- 926 88. Eichenbaum H. *Hippocampus: cognitive processes and neural representations that underlie*  
927 *declarative memory*. *Neuron*. 2004;44(1):109-20.
- 928 89. Al Ain S, Perry RE, Nunez B, Kayser K, Hochman C, Brehman E, et al. Neurobehavioral  
929 assessment of maternal odor in developing rat pups: implications for social buffering. *Social*  
930 *neuroscience*. 2017;12(1):32-49.
- 931 90. Sullivan RM, Stackenwalt G, Nasr F, Lemon C, Wilson DA. Association of an odor with  
932 activation of olfactory bulb noradrenergic beta-receptors or locus coeruleus stimulation is sufficient to  
933 produce learned approach responses to that odor in neonatal rats. *Behavioral neuroscience*.  
934 2000;114(5):957-62.
- 935 91. Suter BA, O'Connor T, Iyer V, Petreanu LT, Hooks BM, Kiritani T, et al. Ephus: Multipurpose  
936 Data Acquisition Software for Neuroscience Experiments. *Frontiers in Neural Circuits*. 2010;4:100.

937

938

939 **Figure legends**

940 **Fig 1. Patterns of axonal connectivity between OB and LEC in neonatal mice.**

941 **(A)** Long-range projections of tdTomato fluorescently labeled OB M/T cells (left) when  
942 superimposed on a bright-field image showing the ventral (middle) and lateral (right) view of  
943 the whole brain of a P10 Tbet-cre;tdTomato mouse. **(B)** Unprocessed (left) and cleared  
944 (right) brain of a P10 mouse. **(C)** Cleared 500  $\mu\text{m}$ -thick coronal section containing the OB of  
945 a Tbet-cre;tdTomato mouse showing MTCs (red) when counterstained with the nuclear  
946 marker DRAQ5 (blue). Inset, tdTomato-stained MTCs displayed at larger magnification. **(D)**  
947 MTC axons targeting LEC in a cleared 1 mm-thick coronal brain slice. Inset, axons of  
948 tdTomato-expressing MTCs when counter-stained with DRAQ5 (blue) and displayed at larger  
949 magnification. **(E)** Photographs of a 100  $\mu\text{m}$ -thick coronal section from a P8 mouse depicting  
950 retrogradely labeled neurons in the OB (right) after injection of FG into the LEC (left) at P3.  
951 Inset, FG-labeled MTCs displayed at larger magnification. **(F)** Photographs of a 50  $\mu\text{m}$ -thick  
952 coronal section from a P8 mouse depicting retrogradely labeled neurons in LEC (right top)  
953 after injection of FG into OB (100  $\mu\text{m}$ -thick coronal section, left) at P4 (LEC, lateral entorhinal  
954 cortex; PIR, piriform cortex; PMCo, posteromedial cortical amygdaloid nucleus; rf, rhinal  
955 fissure; af, amygdaloid fissure). Counterstaining for GABA (red) shows no overlap between  
956 GABA positive (red) and FG (white) labeled cell bodies (right bottom).

957 **Fig 2. Continuous and discontinuous patterns of oscillatory activity in the neonatal**  
958 **olfactory bulb.**

959 **(A)** Digital photomontage reconstructing the track of the multi-site Dil-labeled recording  
960 electrode (red) in a Nissl-stained (green) 100  $\mu\text{m}$ -thick coronal section including the OB from  
961 a P9 mouse. The dots (gray) show the position of the 16 recording sites of the silicon probe  
962 and the recording channels (white) in the mitral cell layer (MCL) and external plexiform layer  
963 (EPL) that were used for spike and LFP analysis, respectively. **(B)** LFP recording of the  
964 oscillatory activity in the OB of a P10 mouse displayed band-pass filtered in different  
965 frequency bands and accompanied by the wavelet spectrogram (white line represents time-  
966 averaged power of the trace; white arrows point towards peak frequency values) as well as

967 simultaneously recorded MUA (high-pass filter >400 Hz) and respiration. **(C)** Characteristic  
968 slow continuous oscillatory activity and theta bursts from the trace shown in b when  
969 displayed at higher magnification. Insets, continuous oscillatory activity in relationship with  
970 respiration (left, blue) and a discontinuous theta burst (right, red). **(D)** Power spectra (mean  $\pm$   
971 SEM) of LFP in OB during non-burst activity (blue) and discontinuous bursts (red) as well as  
972 of theta bursts normalized to non-bursting activity (purple). The respiration frequency was  
973 depicted as horizontal bar and expanded at larger scale (top). **(E)** Temporal relationship  
974 between neuronal firing and network oscillations in OB. Left, histogram showing the  
975 percentage of spikes occurring during theta burst for all clustered units. Right, box plot  
976 depicting the firing rates of OB units during non-burst periods and theta burst periods. Gray  
977 dots and lines correspond to individual cells (Wilcoxon signed-rank test, \*\*\* $p < 0.001$ ). **(F)**  
978 Histograms depicting the phase locking of OB cells to RR (left) and theta activity (right). Only  
979 significantly locked cells were used for analysis.

980 **Fig 3. Effects of optogenetic silencing of MTCs on the patterns of oscillatory activity in**  
981 **the neonatal OB.**

982 **(A)** Photograph of the brain of a P8 cre-positive Tbet-cre;ArchT-EGFP mouse (left) showing  
983 EGFP-fluorescent MTCs cell bodies and their projections. **(B)** Left, photograph of a 100  $\mu$ m-  
984 thick coronal section including the OB from a P8 cre-positive Tbet-cre;ArchT-EGFP mouse.  
985 The position of recording sites in MCL and EPL layers is marked by white squares. The light  
986 guide ending just above the recording sites is shown in gray. The iso-contour lines of light  
987 spreading calculated using Monte Carlo simulation are shown in yellow. Right, propagation of  
988 light intensity in the brain as predicted by Monte Carlo simulation. Yellow lines correspond to  
989 the iso-contour lines for light power of 1 and 10  $\text{mW}/\text{mm}^2$ , respectively. **(C)** Neuronal firing  
990 (SUA) and LFP band-pass filtered for different frequency bands (broad 1-100 Hz, RR 2-4 Hz,  
991 theta 4-12 Hz) in response to light (yellow, 594 nm) stimulation of MTCs in a P8 cre-positive  
992 Tbet-cre;ArchT-EGFP mouse. Traces are accompanied by the color-coded wavelet  
993 spectrogram of LFP shown at identical timescale. **(D)** Raster plots and peri-stimulus time  
994 histograms displaying the firing of MTCs in response to light stimulation. The color-coded bar

995 (bottom) displays the fraction of cells that responded with a firing decrease during stimulus  
996 (red), constant firing during stimulus but a firing increase post-stimulus (blue) and unchanged  
997 firing rate (white). **(E)** Box plots displaying the absolute power before and during light  
998 stimulation in cre-positive pups (left) and the relative change of RR activity in neonatal OB of  
999 cre-positive and cre-negative mice (right). Gray dots and lines correspond to individual  
1000 animals. **(F)** Same as E for discontinuous theta bursts (\*\* $p < 0.01$ , left: signed-rank test, right:  
1001 rank-sum test).

1002 **Fig 4. Continuous and discontinuous patterns of oscillatory activity in the neonatal**  
1003 **LEC.**

1004 **(A)** Digital photomontage reconstructing the track of the multi-site Dil-labeled recording  
1005 electrode (red) in a Nissl-stained (green) 100  $\mu\text{m}$ -thick coronal section including LEC from a  
1006 P9 mouse. The gray dots show the position of the 16 recording sites. (PRh, perirhinal cortex;  
1007 LEC, lateral entorhinal cortex; PIR, piriform cortex; rf, rhinal fissure; af, amygdaloid fissure).  
1008 **(B)** LFP recording of the oscillatory activity in LEC of a P10 mouse displayed band-pass  
1009 filtered in different frequency bands and accompanied by the wavelet spectrogram (white line  
1010 represents time-averaged power of the trace) as well as simultaneously recorded MUA (high-  
1011 pass filter  $>400$  Hz) and respiration. **(C)** Characteristic slow continuous oscillatory activity  
1012 and theta bursts from the trace shown in B when displayed at higher magnification. **(D)**  
1013 Power spectra (mean  $\pm$  SEM) of LFP in LEC during non-burst activity (blue) and  
1014 discontinuous bursts (red) as well as of theta bursts normalized to non-bursting activity  
1015 (purple). The respiration frequency was depicted as horizontal bar and expanded at larger  
1016 scale (top). **(E)** Temporal relationship between neuronal firing and network oscillations in  
1017 LEC. Left, histogram showing the percentage of spikes occurring during theta burst for all  
1018 clustered units. Right, box plot depicting the firing rates of LEC units during non-burst periods  
1019 and theta burst periods. Gray dots and lines correspond to individual cells (Wilcoxon signed-  
1020 rank test, \*\*\* $p < 0.001$ ). **(F)** Histograms depicting the phase locking of LEC neurons to RR  
1021 (left) and theta activity (right). Only significantly locked cells were used for analysis.

1022

1023 **Fig 5. Frequency-dependent functional coupling between neonatal OB and LEC.**

1024 **(A)** Characteristic traces of band-pass filtered LFP recorded simultaneously in OB (top) and  
1025 LEC (bottom) of a P9 mouse, displayed together with wavelet spectrograms showing the  
1026 frequency content. Note the temporal correlation between discontinuous theta bursts in both  
1027 areas. **(B)** Boxplots displaying RR power (top, green) and theta burst power (bottom, purple)  
1028 in OB and LEC. Gray lines and dots correspond to individual pups. (\* $p < 0.05$ , Wilcoxon  
1029 signed-rank test). **(C)** Plot of imaginary part of coherence between OB and LEC showing  
1030 prominent peaks in RR and theta band. The gray line corresponds to the significance  
1031 threshold as assessed by Monte Carlo simulation. **(D)** Histograms of phase differences  
1032 between RR (left, green) and theta (right, purple) activity recorded simultaneously in OB and  
1033 LEC. **(E)** Left, bar diagram displaying the percentage of OB units coupled to the RR (green)  
1034 and theta bursts (purple) in LEC and the percentage of LEC units coupled to the RR (green)  
1035 and theta bursts (purple) in OB. Right, box plot showing the coupling strength of OB cells  
1036 significantly locked to LEC oscillations (green: RR, purple: theta bursts) and of LEC cells  
1037 significantly locked to OB oscillations (green: RR, purple: theta bursts). Gray dots correspond  
1038 to individual cells ( $\chi^2$  test of proportions \*\*\* $p < 0.001$ ). **(F)** Histograms showing the distribution  
1039 of preferred phases of LEC cells significantly locked to RR (left) and OB theta bursts (right) in  
1040 neonatal OB. For comparison, histograms of OB cells locked to the respective OB rhythm are  
1041 plotted as white bars. **(G)** Histograms showing the distribution of preferred phases of OB  
1042 cells significantly locked to RR (left) and theta bursts (right) in neonatal LEC. For  
1043 comparison, histograms of LEC cells locked to the respective LEC rhythm are plotted as  
1044 white bars.

1045 **Fig 6. Effects of pharmacological blockade of neuronal firing in OB on patterns of**  
1046 **oscillatory activity in OB-LEC circuits.**

1047 **(A)** Schematic drawing of experimental protocol. **(B)** Photograph of the brain of a P10 mouse  
1048 showing the confinement of injections to one hemisphere of the OB. For visualization, the  
1049 same volume of methylene blue was used. **(C)** Characteristic LFP traces (black, filtered 1-  
1050 100 Hz) recorded in OB (top) and LEC (bottom) of a P9 mouse before (left) and after (right)

1051 lidocaine infusion, displayed together with the wavelet spectrograms of the LFP and  
1052 simultaneously recorded MUA. **(D)** Top, mean MUA firing rate in OB (left) and LEC (right)  
1053 before and after lidocaine infusion. The time of infusion is considered 0. Bottom, box plots  
1054 displaying the mean MUA in OB (left) and LEC (right) before and after lidocaine infusion  
1055 (Friedmann test, Wilcoxon signed-rank test with Bonferroni correction for post-hoc  
1056 comparison,  $*p < 0.0071$ ). **(E)** Box plots displaying the power of RR activity in OB and LEC as  
1057 well as the mean OB-LEC coherence in the RR band before and after lidocaine infusion.  
1058 Gray dots and lines correspond to individual animals (Wilcoxon signed-rank test,  $*p < 0.05$ ;  
1059  $**p < 0.01$ ). **(F)** Same as E for the theta burst activity in neonatal OB and LEC.

1060 **Fig 7. Odor-triggered activity patterns in OB of neonatal mouse.**

1061 **(A)** Characteristic LFP traces (band-pass filtered 1-100 Hz) recorded in OB (top) and LEC  
1062 (bottom) of a P9 mouse before (baseline, left) and after application of odors (saline, middle;  
1063 octanal, right) displayed together with simultaneously recorded MUA. **(B)** Box plots showing  
1064 odor-evoked changes in the amplitude of RR (left), theta (middle) and beta (right) activity in  
1065 OB when normalized to baseline. **(C)** Same as B for LEC. **(D)** Odor-evoked relative changes  
1066 in OB-LEC coherence in RR (left), theta (middle) and beta (right) band when normalized to  
1067 baseline. Gray dots correspond to individual trials. (Kruskal-Wallis H test, Wilcoxon rank-sum  
1068 test with Bonferroni correction as post-hoc test,  $*p < 0.0167$ ).

1069 **Fig 8. Schematic diagram of structural and functional coupling within OB-LEC**  
1070 **networks of neonatal mice.**

1071 Mutual axonal projections (red) connect neonatal OB and LEC. In OB of neonatal mice,  
1072 continuous air flow-dependent RR and discontinuous MTC-driven theta bursts represent the  
1073 two major patterns of oscillatory activity. They are augmented by olfactory stimuli (blue) that  
1074 additionally evoke beta oscillations. OB activity boosts the oscillatory entrainment of neonatal  
1075 LEC that, in turn, might drive the limbic circuits during development.

1076



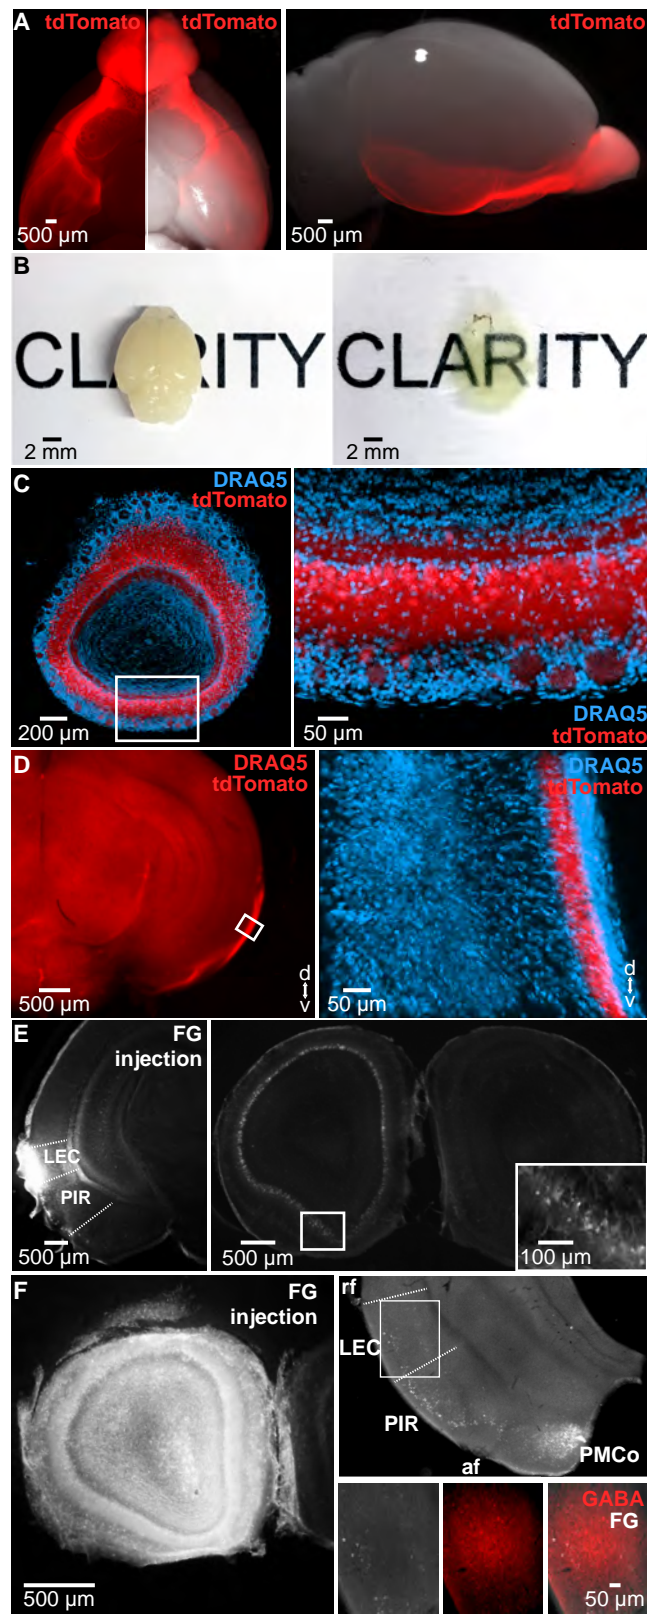

Gretenkord et al. - Figure 1

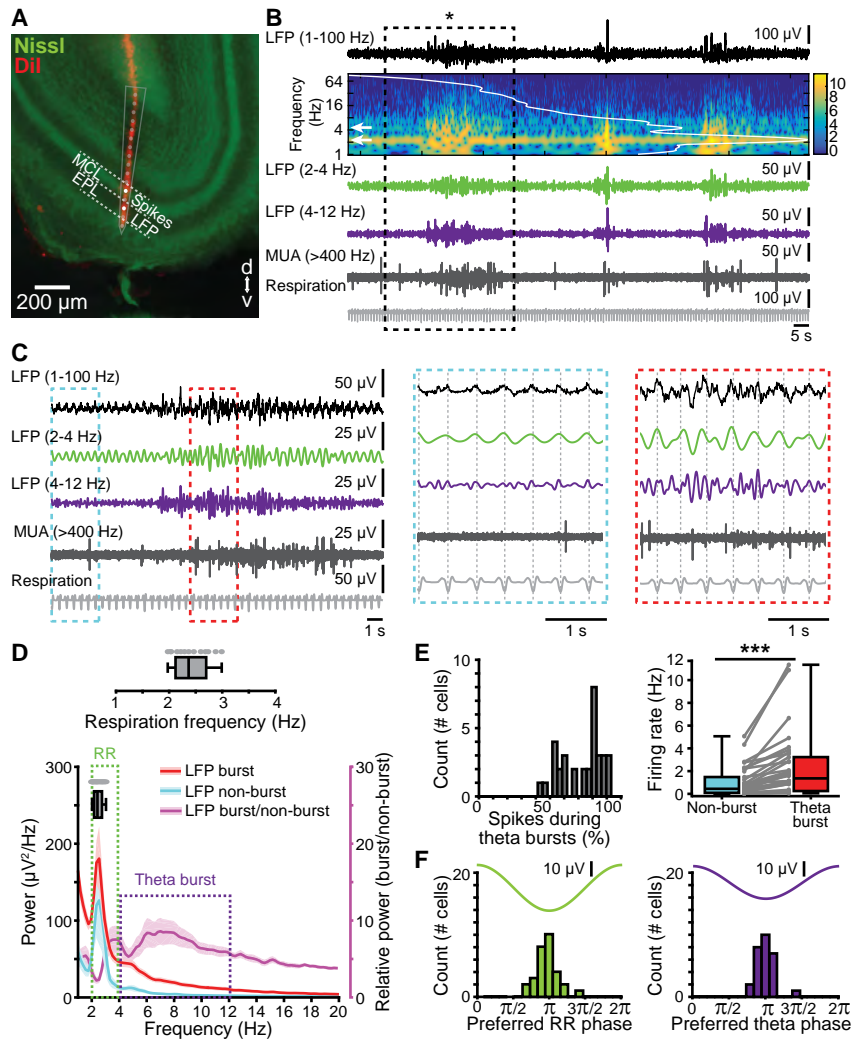

Gretenkord et al. - Figure 2



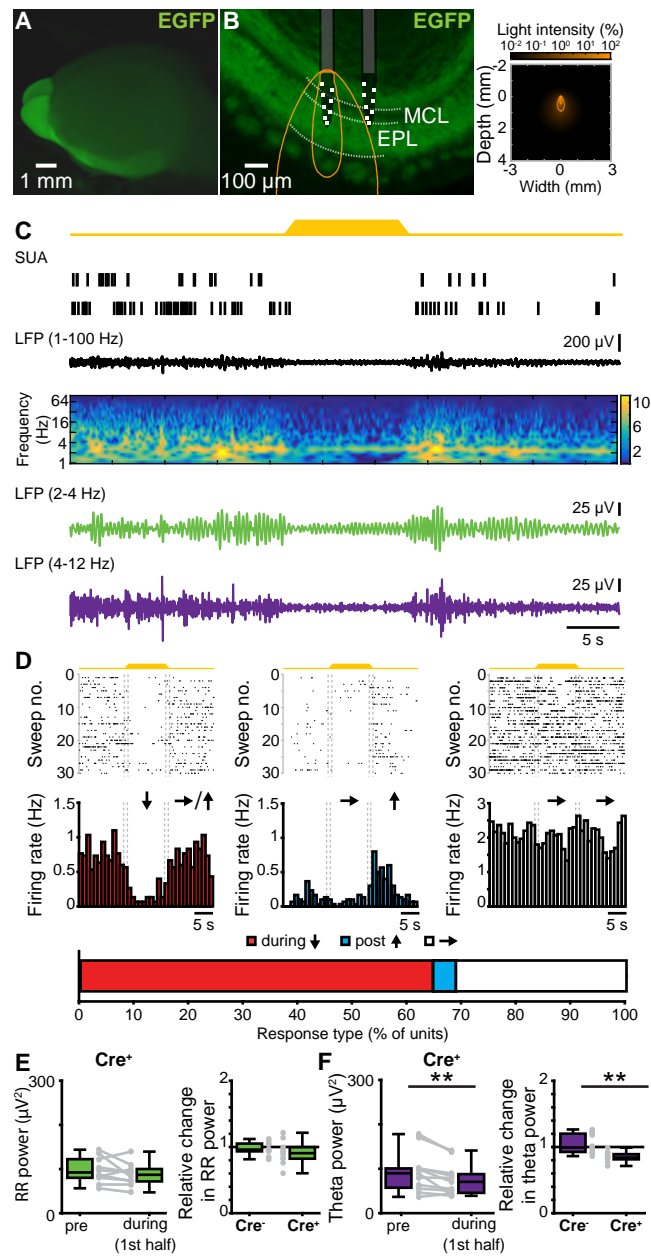

Gretenkord et al. - Figure 3

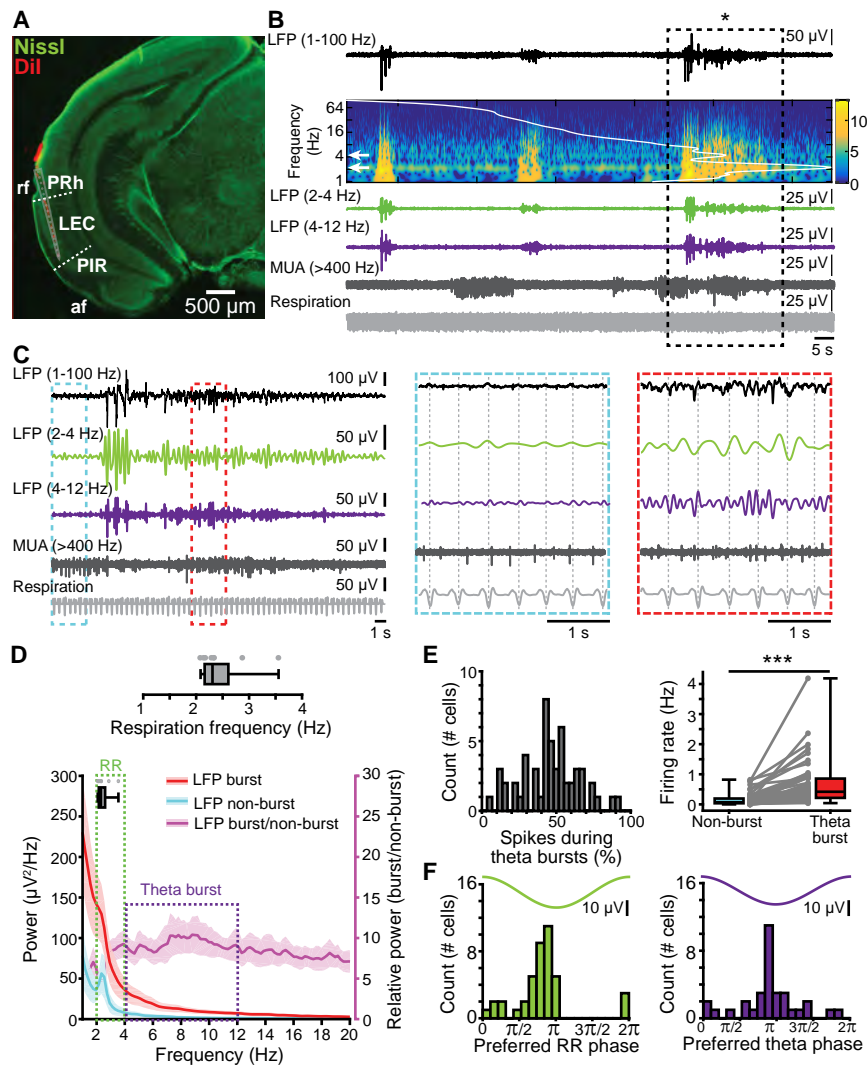

Gretenkord et al. - Figure 4

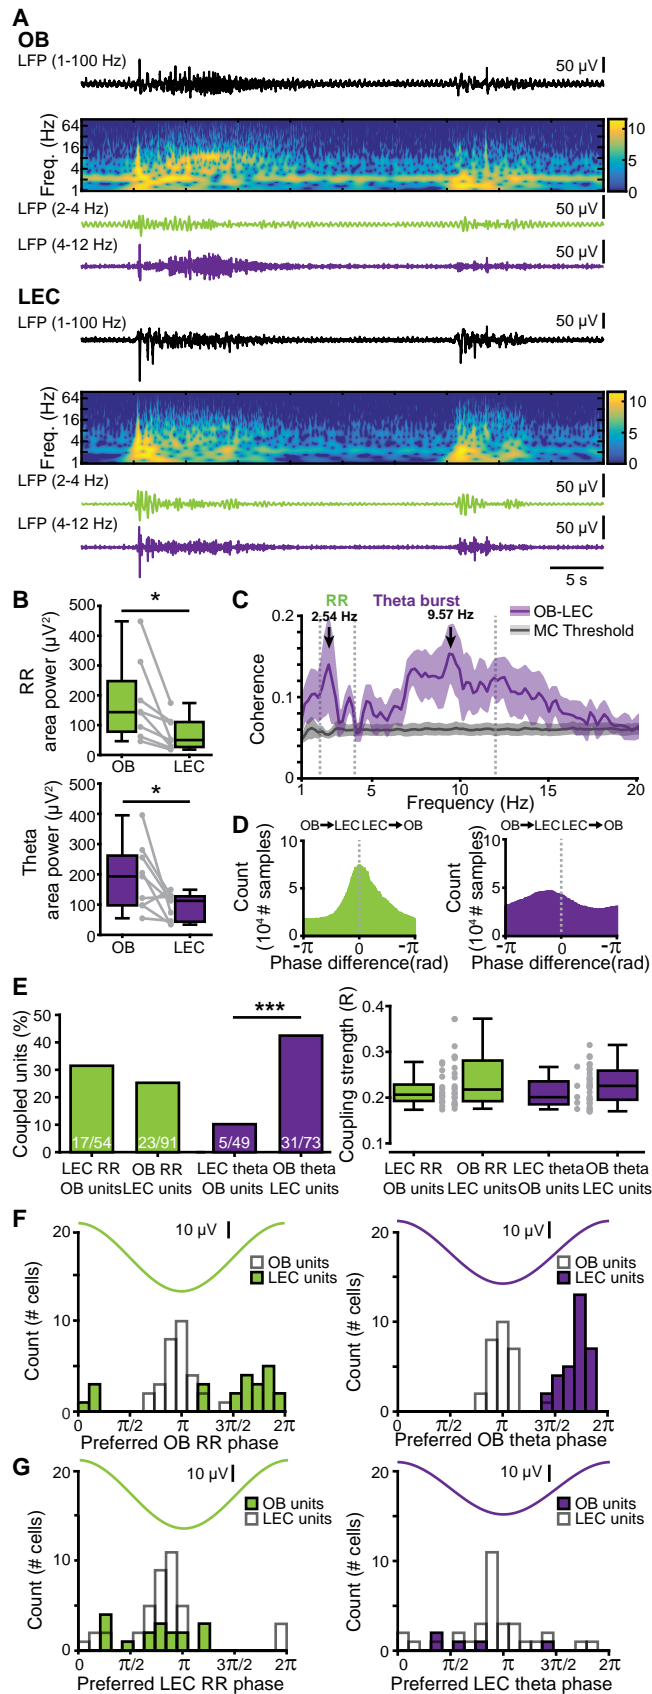

Gretenkord et al. - Figure 5

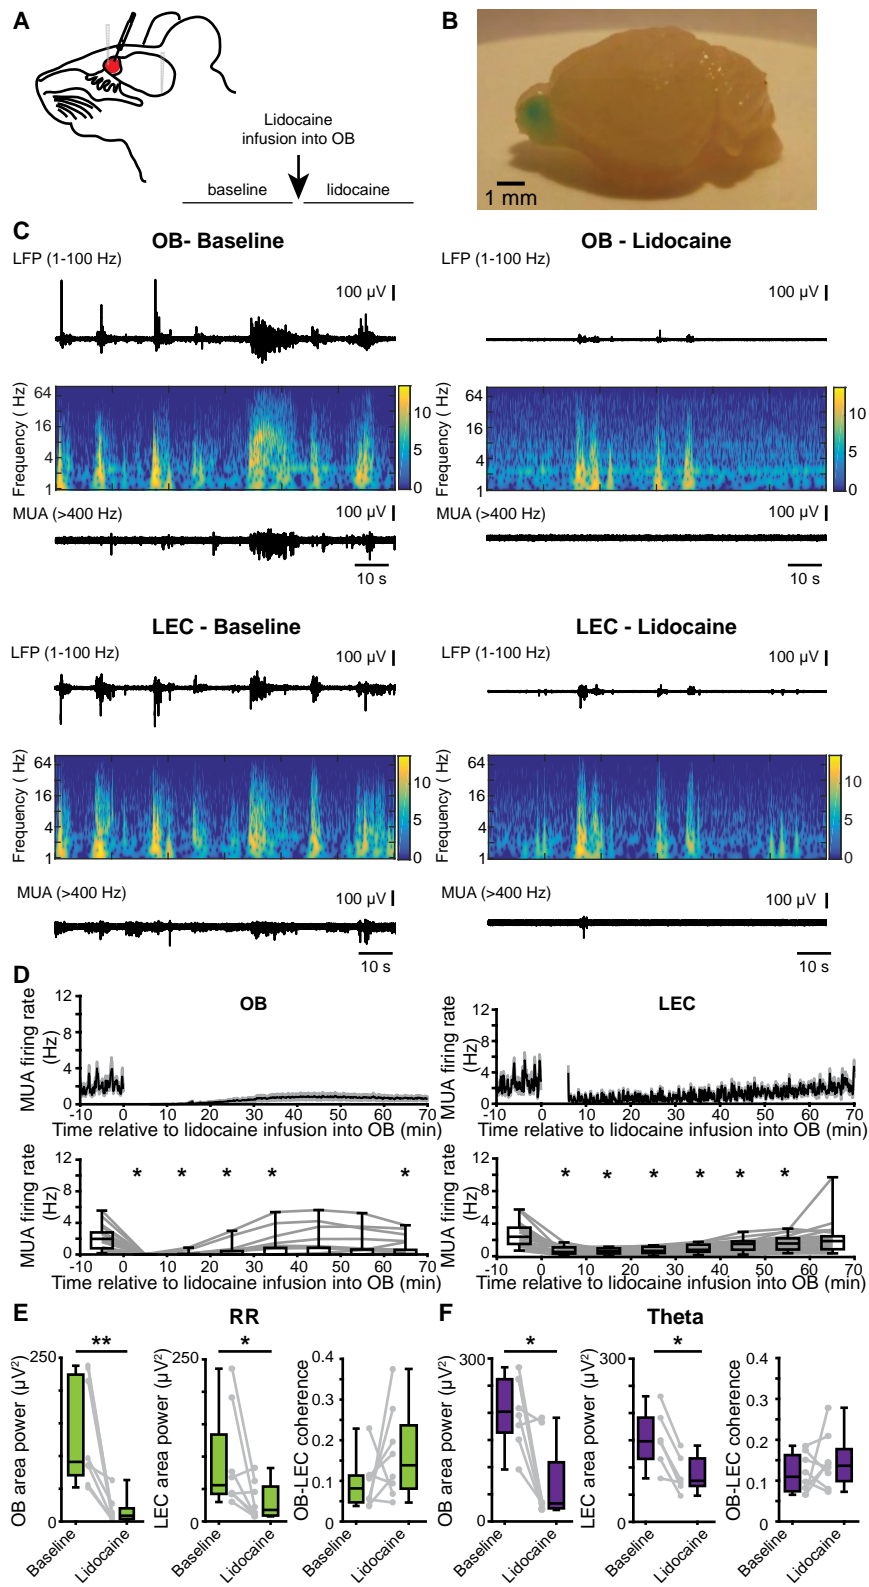

Gretenkord et al. - Figure 6

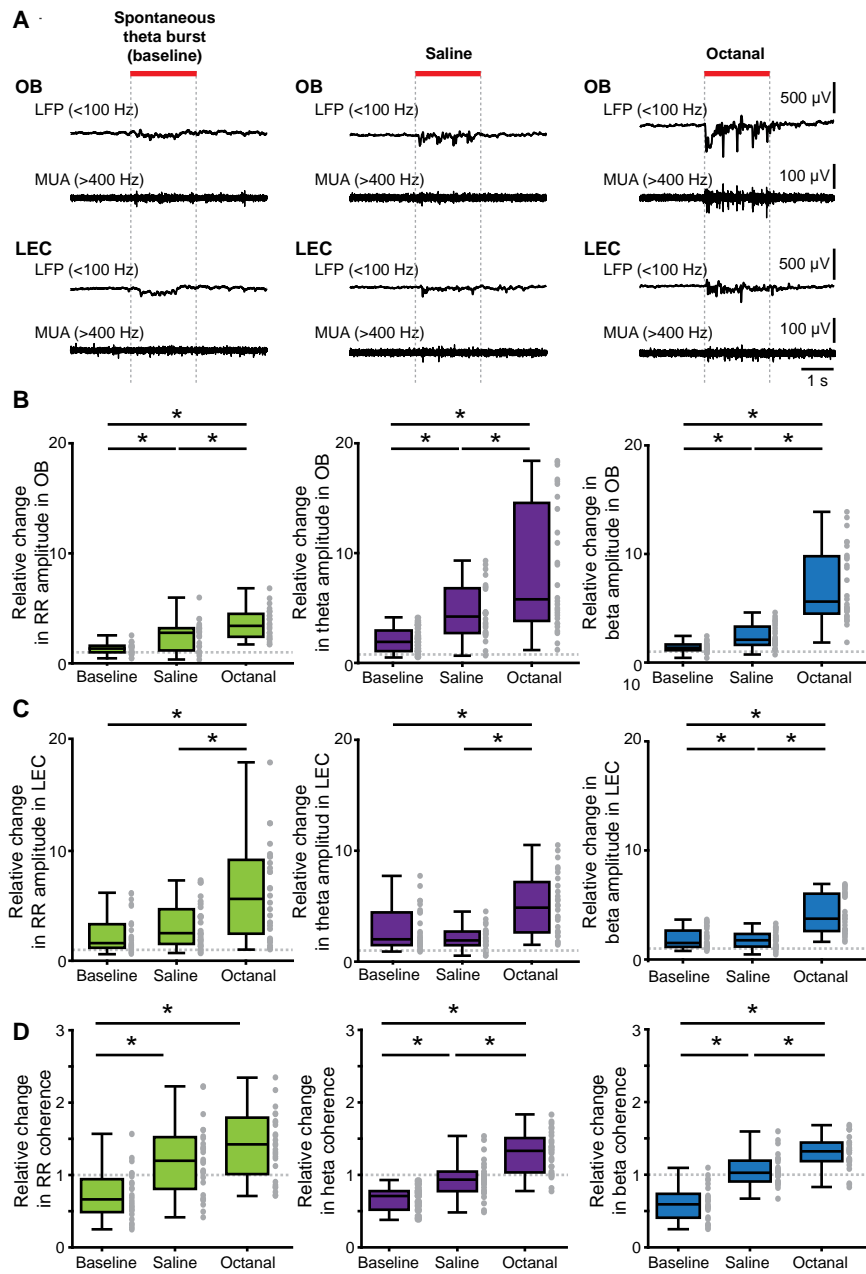

Gretenkord et al. - Figure 7

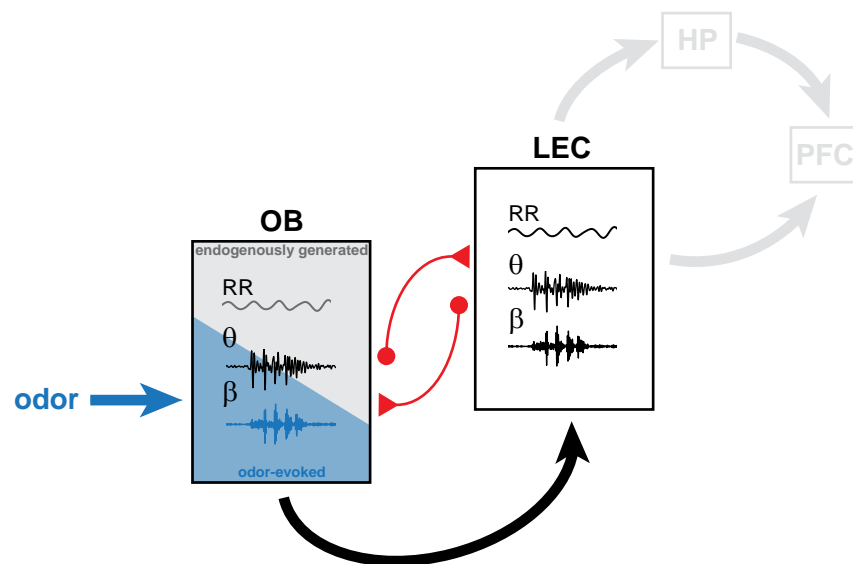

Gretenkord et al. - Figure 8
